# Supplementary material for: Novel and efficient method for culturing patient‐derived gastric cancer stem cells
Source: PubMed Central journal article supplement — Cancer Sci. 2023 May 20;114(8):3259–69. doi: 10.1111/cas.15840 (PMC10394150; doi:10.1111/cas.15840), 2023-05-20
Supplement: CAS-114-3259-s001.pdf [file CAS-114-3259-s001.pdf]

## **Supplementary Materials and Methods**

### **Morphological observation of spheroids**

Phase-contrast images of spheroids were captured using an Olympus IX70 microscope equipped with an Olympus DP70 digital camera (Olympus, Tokyo, Japan).

### **Preparation of DNA and histology specimens of spheroids**

Spheroids in Matrigel were suspended in Cell Recovery Solution (Corning), and they were incubated at 4°C for 30–60 min. Spheroids in collagen type-I were suspended in collagenase solution, and they were incubated at 37°C for 30 min. Next, the spheroids were centrifuged at  $200 \times g$  for 5 min and washed with PBS. Genomic DNA was purified using a DNeasy Blood & Tissue Kit (Qiagen, Venlo, the Netherlands). For histological analyses, spheroids were embedded in iPGell (Genostaff, Tokyo, Japan) and fixed with 4% paraformaldehyde in PBS at 4°C for 3 days.

### **Patient-derived spheroid xenograft (PDSX)**

Four- to six-week-old female nude and NSG mice were purchased from The Jackson Laboratory Japan (Yokohama, Japan). The spheroid suspension was subcutaneously injected into mice as

described previously.<sup>34</sup>

### **Histopathological classification of gastric cancer**

Formalin-fixed, paraffin-embedded specimens were sectioned into 4- $\mu$ m thick sections, and

they were stained with H&E. Histological images were captured using a Leica DM2000

microscope (Leica, Wetzlar, Germany) equipped with an Olympus DP73 digital camera

(Olympus), and histological grades of primary tumors and spheroids were determined according

to the 5th edition of WHO guidelines.<sup>4</sup>

### **Immunohistochemistry**

Primary antibodies against MLH-1 (M1, Ventana, Oro Valley, AZ, USA), PMS2 (EPR 3947,

Ventana), MSH2 (G219-1129, Ventana), MSH6 (EPR3945, Abcam, Cambridge, UK), Ki67 (SP6,

ThermoFisher, Waltham, MA, USA), CDX2 (SM392-5M, BioGenex, Fremont, CA, USA), and

MUC2 (CCP58, Agilent, Santa Clara, CA, USA) were purchased from commercial sources.

Deparaffinized sections were incubated in Trilogy solution (Sigma-Aldrich) at 95°C for 60 min for

unmasking target antigens, and they were further incubated in 0.3% H<sub>2</sub>O<sub>2</sub> in methanol to

inactivate endogenous peroxidases at room temperature for 15 min. Primary antibodies diluted

in the blocking buffer [5% goat serum (Vector Laboratories, Burlingame, CA, USA) and 3%

bovine serum albumin (Sigma-Aldrich) in PBS] were applied on the sections. Specific signals were visualized using OptiView DAB IHC Detection Kit (Ventana) or the VECTASTAIN Elite ABC Kit (Vector Laboratories).

### **Quantitative RT-PCR (qRT-PCR)**

First strand cDNA was synthesized using ReverTra Ace kit (TOYOBO, Osaka, Japan), and qPCR was performed using SYBR qPCR Mix (TOYOBO) on an StepOnePlus thermal cycler (ThermoFisher). Expression levels were normalized relative to those of *ACTB*. Sequences of primer pairs were as follows: *MKI67*, TCCTTTGGTGGGCACCTAAGACCTG and TGATGGTTGAGGTCGTTCCCTTGATG; *LGR5*, CCTTCATAAGAAAGATGCTGGAA and GTTTAATGGGGGAAATGTACAGA; *ACTB*, GGGGTGTTGAAGGTCTCAA and GGCATCCTCACCTGAAGTA.

**Supplementary figure 1:** A schematic workflow for monitoring cell growth using optical cell imaging.

**(A)**

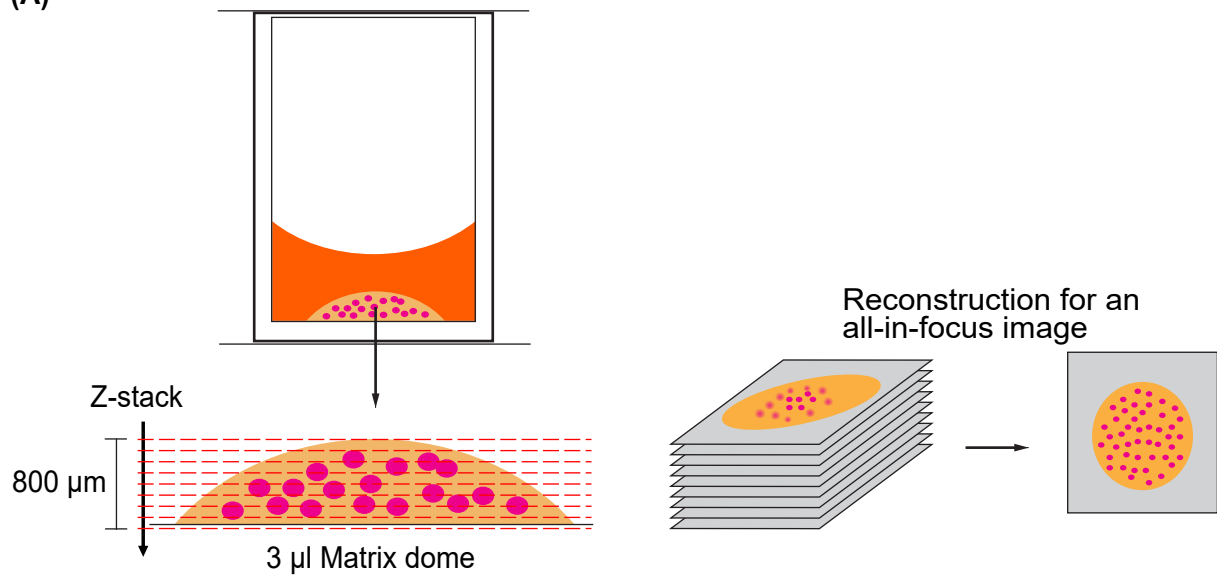

**(B)**

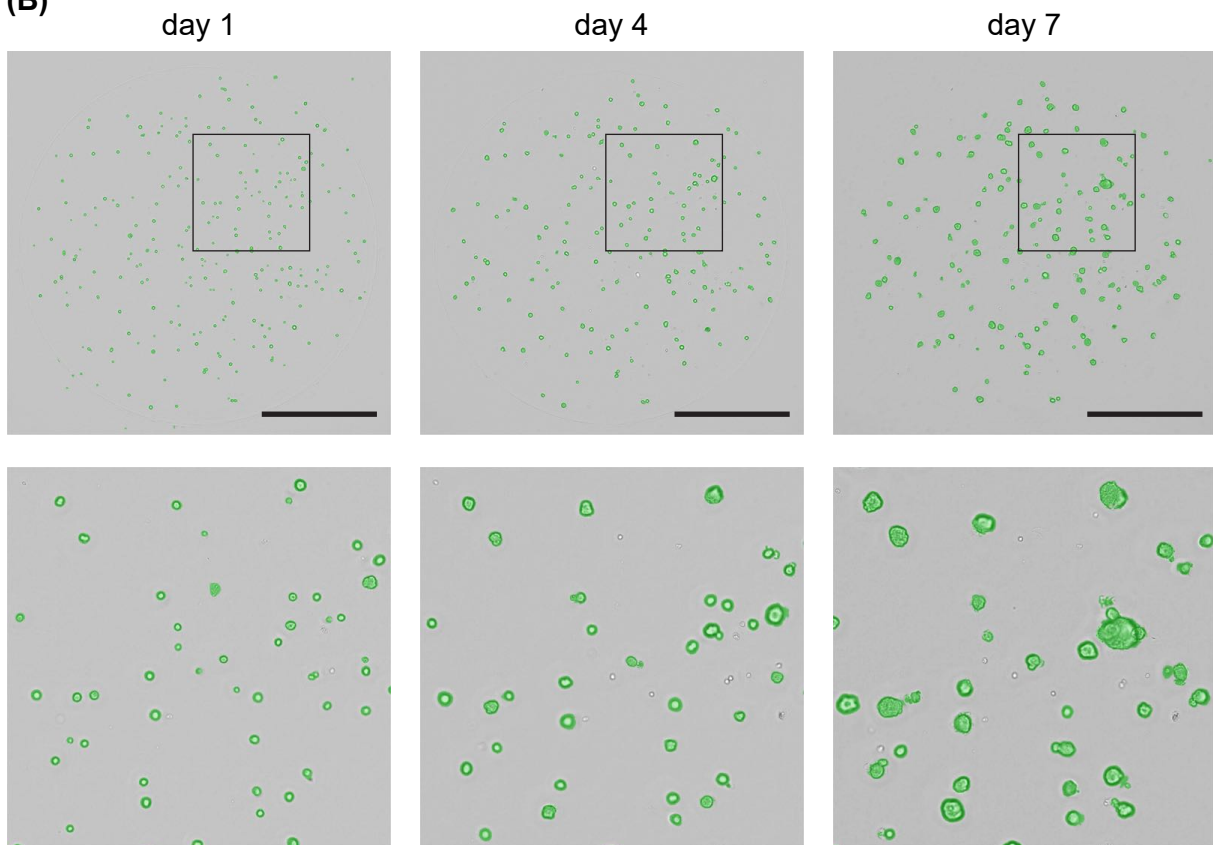

**(A)** Outline of the cell scanning procedures. Nine Z-stack images were acquired for each matrix dome (3 µL), and they were reconstructed to generate an all-in-focus image. **(B)** Time course of the spheroid growth. Shown are the reconstituted images of HG16T spheroids (top) and their higher magnification (bottom) at 1, 4, and 7 days after passage. Object areas recognized as spheroids are shown in green. Scale bar, 1 mm.

**Supplementary figure 2:** Histopathological characterization of patient-derived gastric cancer stem cell (PD-GC-SC) spheroids.

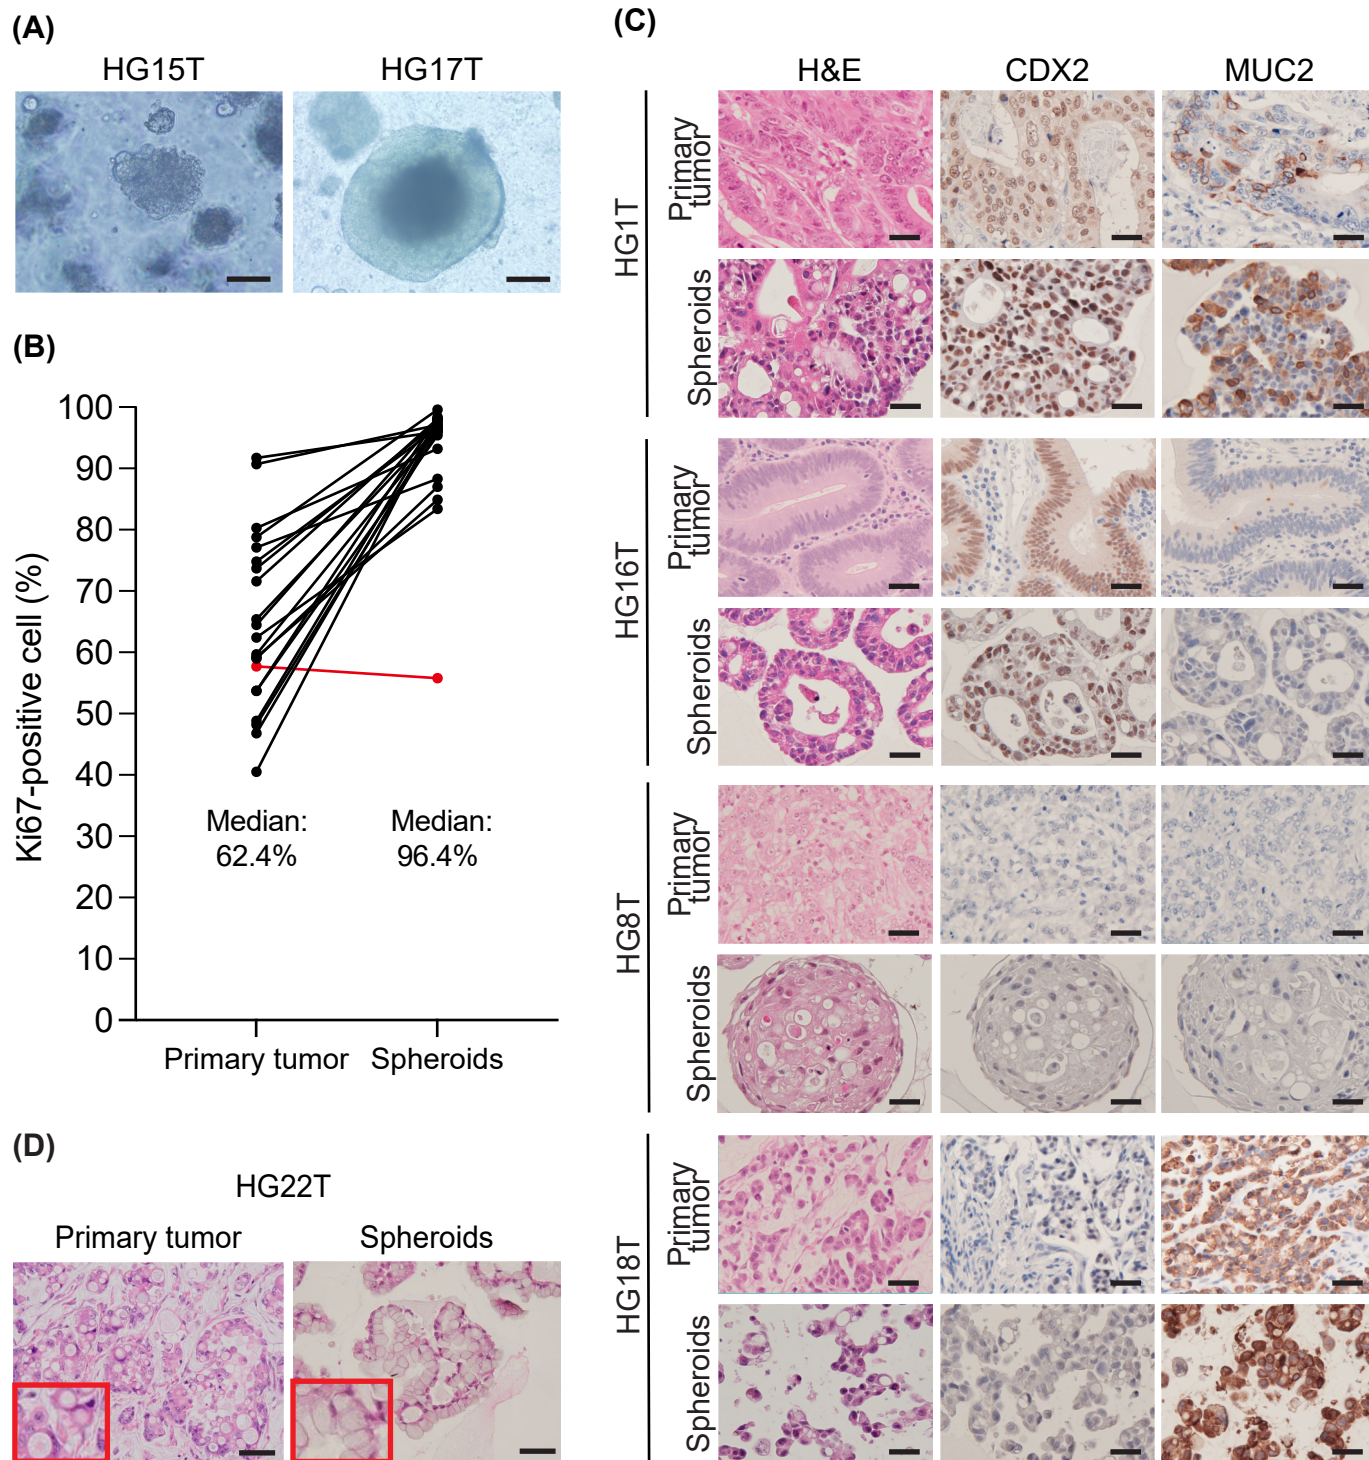

**(A)** Representative phase-contrast micrographs of GC-SC spheroids. Scale bar, 200  $\mu\text{m}$ . **(B)** The fraction of proliferating cells monitored by immunohistochemistry for Ki67. The average percentages of Ki67-positive cells in three microscopic fields are shown as raw data points with lines connecting the pairs of the primary tumors and spheroids from the same GC patients ( $n = 21$ ). Note that proliferating cells were enriched in spheroids more than in primary tumors in all cases except for one diffuse-type tumor (HG8T, red).  $P < 0.0001$ , statistical significance of the data difference (Wilcoxon test). **(C)** Pairs of the primary tumor (top) and spheroid specimens (bottom) from the same GC patients analyzed by H&E staining (left), and by immunohistochemistry for CDX2 (center) and MUC2 (right). HG1T, tubular adenocarcinoma containing CDX2-positive moderately differentiated tumor cells forming the tubular structure. HG16T, tubular adenocarcinoma containing CDX2-positive well-differentiated tumor cells forming the tubular structure. MUC2-positive cells were heterogeneously distributed in HG1T but rarely observed in HG16T. HG8T, poorly cohesive carcinoma containing CDX2-negative/MUC2-negative poorly differentiated tumor cells. HG18T, mucinous adenocarcinoma containing CDX2-low/MUC2-positive poorly differentiated tumor cells. Scale bar, 50  $\mu\text{m}$ . **(D)** A pair of H&E-stained specimens of the primary tumor (left) and spheroids (right) from the same GC patient (HG22T, poorly cohesive carcinoma with signet-ring cells). Spheroids were cultured in the cancer medium without L-WRN conditioned medium for three days. Insets indicate cells with large vacuoles and compressed nuclei. Scale bar, 50  $\mu\text{m}$ .

**Supplementary figure 3:** Characterization of tumor-initiating gastric cancer (GC) cells in patient-derived spheroid xenograft (PDSX) tumors.

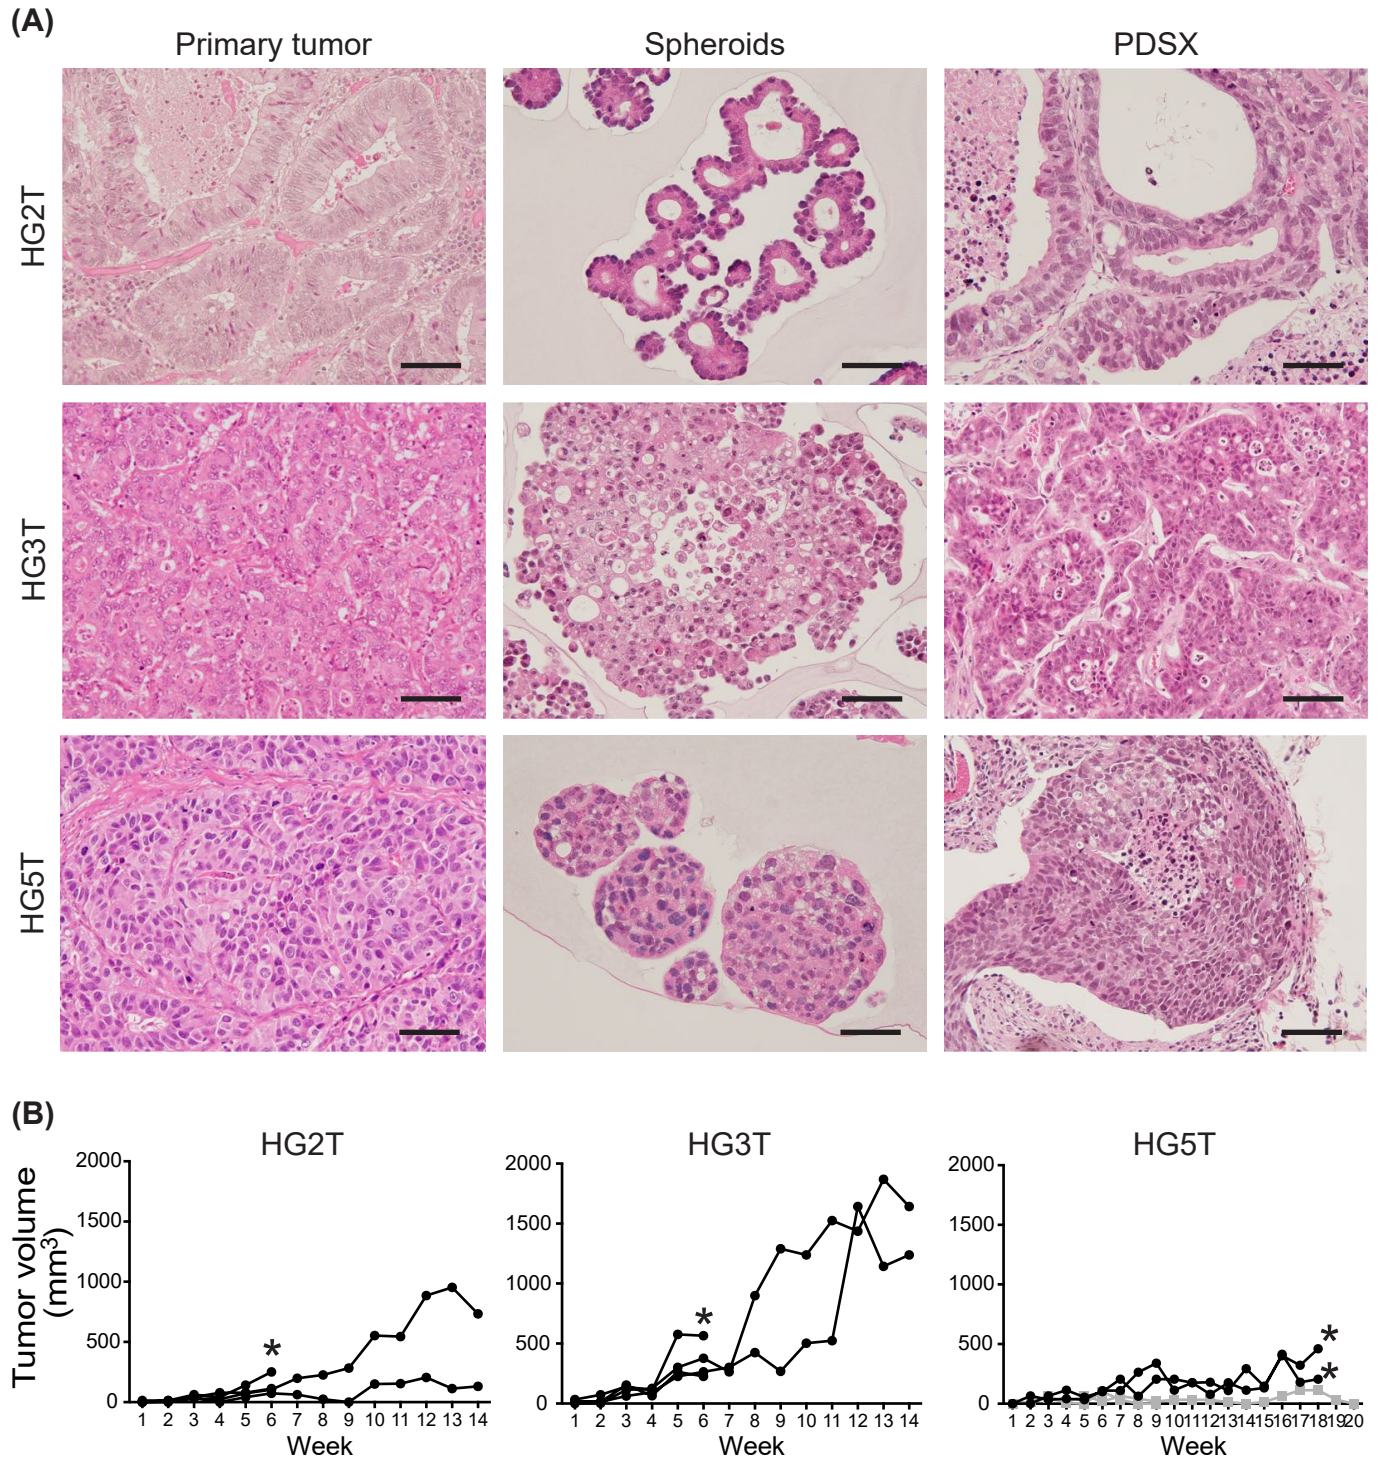

**(A)** Pairs of the primary tumor (left), spheroids (center), and PDSX specimens (right) from the same patients analyzed by H&E staining. HG2T, tubular adenocarcinoma containing well-differentiated tumor cells forming the tubular structure. HG3T, tubular adenocarcinoma containing moderately differentiated cells forming the tubular structure. HG5T, tubular adenocarcinoma containing poorly differentiated cells forming the solid structure. Scale bar, 50  $\mu$ m. **(B)** Growth curves of PDSX tumors derived from GC spheroids, HG2T (n = 3), HG3T (n = 3), and HG5T (n = 4). Mice were sacrificed when they became moribund (asterisks). The tumor regressed in two PDSX mice for HG5T (gray lines).

**Supplementary figure 4:** Detection of mismatch repair deficiency in gastric stem cell (GC-SC) spheroids.

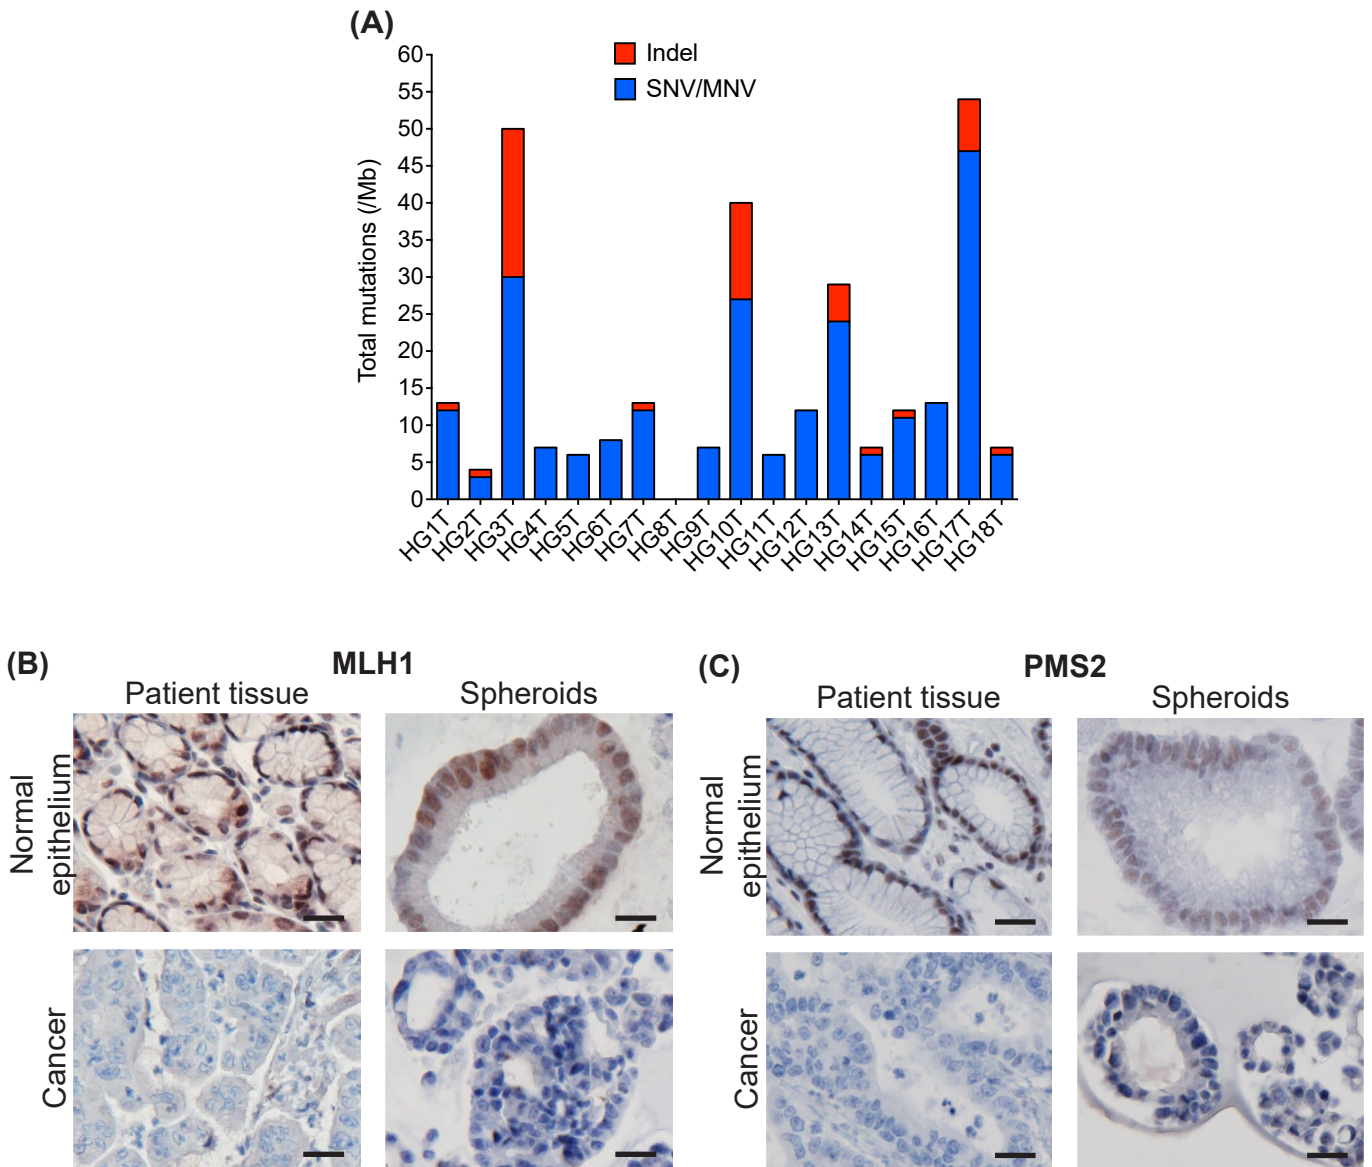

**(A)** Mutational burden estimated by exonic sequencing of 409 cancer-related genes spanning 1.29 Mb. Indel, insertion/deletion variant. SNV/MNV, single nucleotide variant/multi-nucleotide variant. **(B, C)** Immunohistochemistry for mismatch repair proteins, MLH1 (B) and PMS2 (C). Shown are paired specimens of the patient tissue (left) and spheroids (right) of the normal gastric epithelium (top) and GC (bottom) derived from the same patient (HG10T). Scale bar, 25  $\mu$ m.



**Supplementary figure 5:** Dose-dependent effects of L-WRN conditioned media (CM) on gene expression in normal colonic epithelial stem cell (NCE-SC) spheroids.

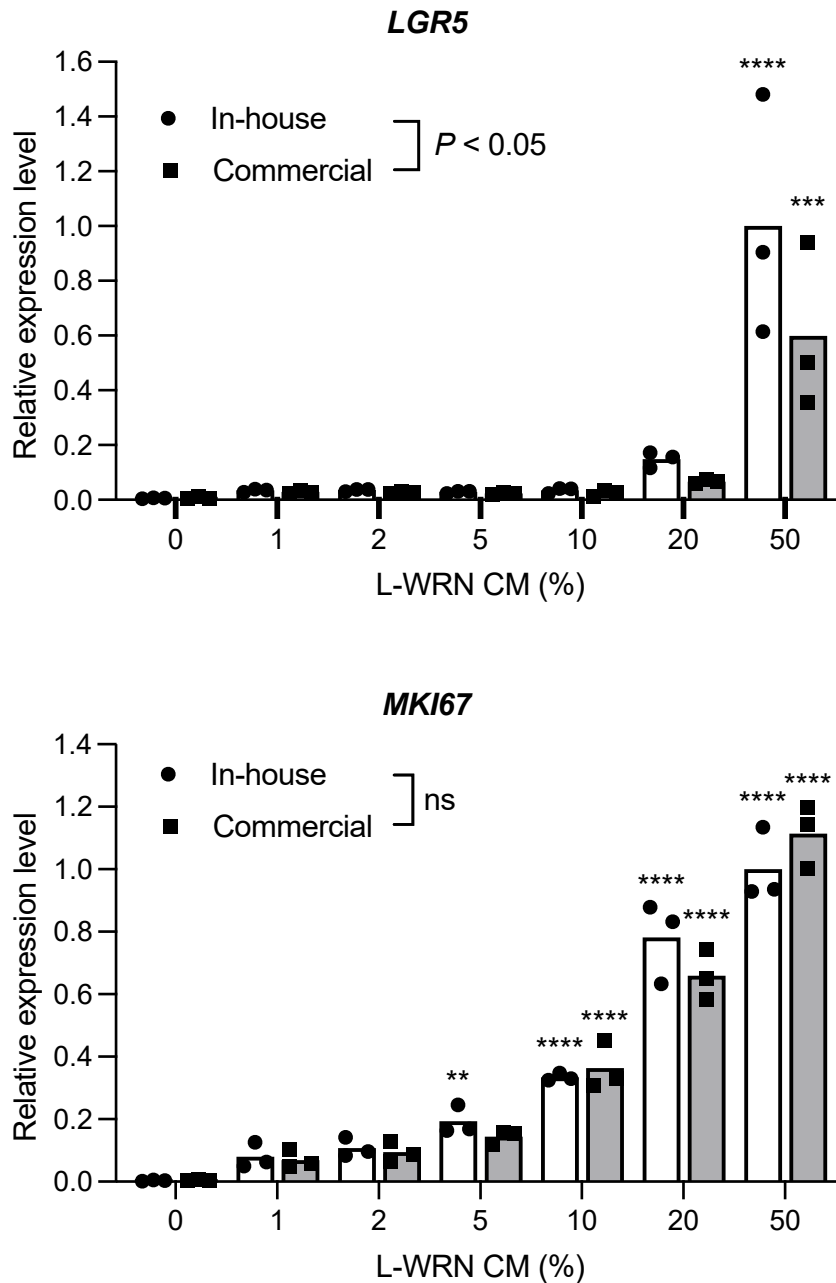

NCE-SC spheroids were cultured for 3 days in the eL-WRN media containing indicated percentages of L-WRN CM from two different sources (in-house and commercial). Plots with the means of relative expression levels of LGR5 (top) and MKI67 (bottom) were determined by qRT-PCR analysis. \*\* $P < 0.01$ ; \*\*\* $P < 0.001$ ; \*\*\*\* $P < 0.0001$ , statistical significance of the data difference between untreated (0%) and treated groups in three independent experiments (two-way ANOVA followed by Šidák's post-test).

**Supplementary figure 6:** Effects of L-WRN conditioned medium (CM) concentrations on the growth of normal gastric epithelial stem cells (NGE-SCs).

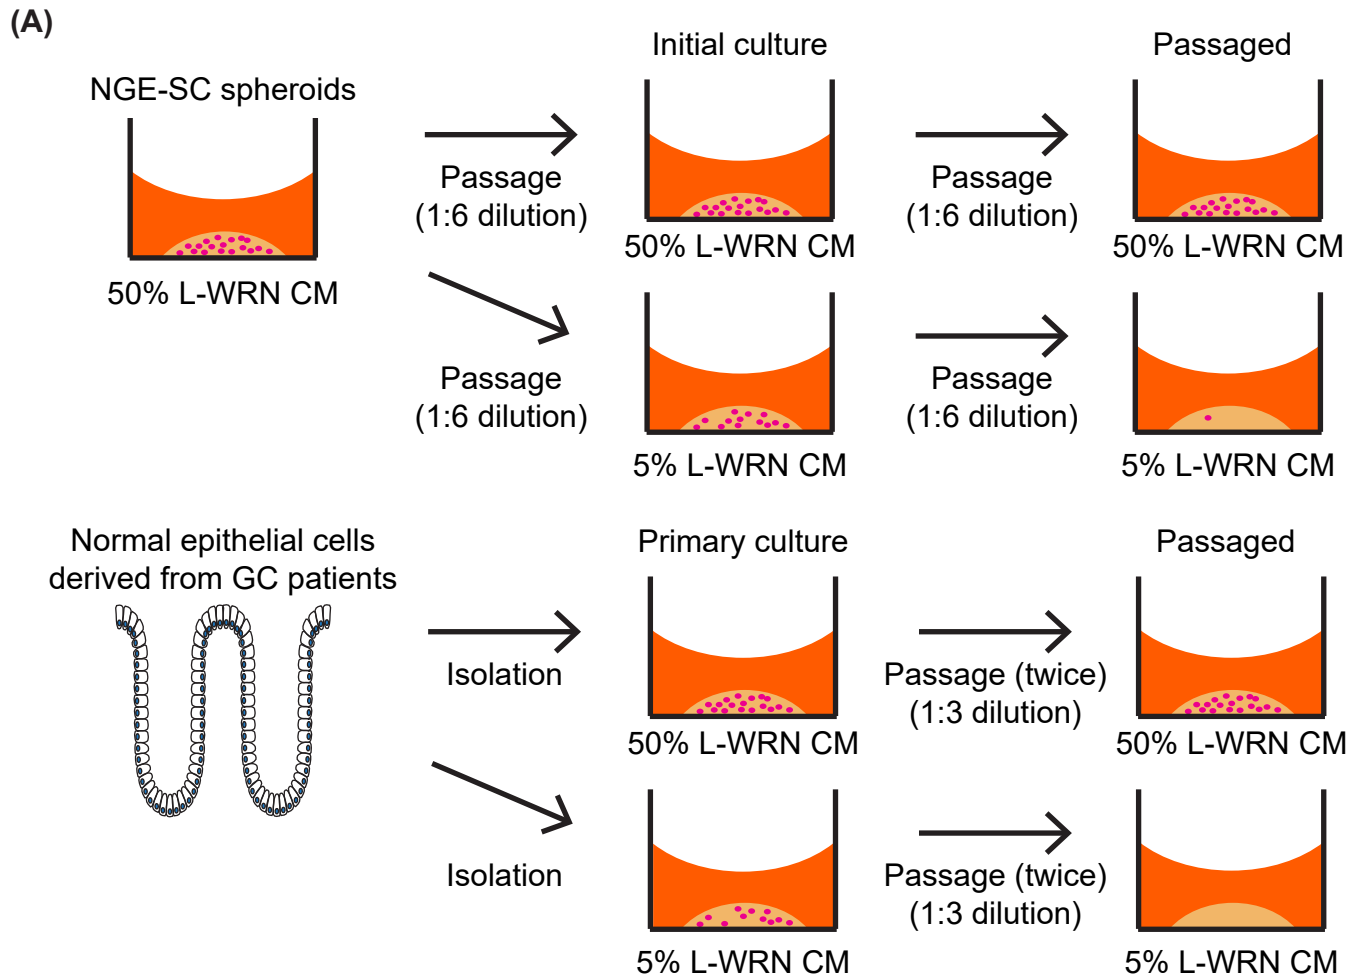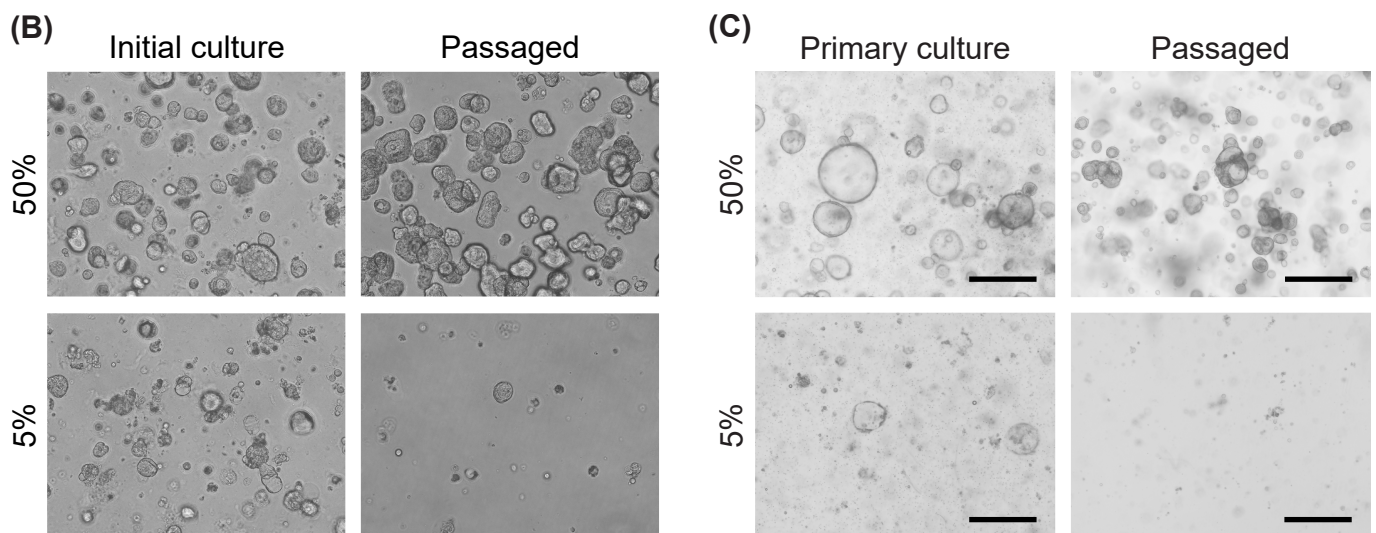

**(A)** Schematic of the experimental procedure. **(B)** NGE-SC spheroids were cultured in the cancer medium containing 50% (top) or 5% (bottom) L-WRN CM for 3 days (left; Initial culture), passaged at a split ratio of 1:6, and cultured for another 3 days (right; Passaged). Scale bar, 200 μm. **(C)** Normal gastric epithelial cells isolated from patient samples were cultured in the cancer medium containing 50% (top) or 5% (bottom) L-WRN CM for 6 days (left; Primary culture). Then spheroids were cultured for another 12 days with two serial passages at a split ratio of 1:3 (right; Passaged). Scale bar, 200 μm.

**Supplementary table 1: Composition of media.**

| Reagent                                                                      | Final conc. | Source                |
|------------------------------------------------------------------------------|-------------|-----------------------|
| <b>Washing medium</b>                                                        |             |                       |
| DMEM/F12 with HEPES and L-glutamine                                          |             | Nacalai Tesque        |
| Penicillin-streptomycin solution (100 x)                                     | 1 x         | Nacalai Tesque        |
| Calf serum                                                                   | 10%         | Sigma-Aldrich         |
| <b>Collagenase solution</b>                                                  |             |                       |
| <b>Washing medium</b>                                                        |             |                       |
| Collagenase type I                                                           | 0.2%        | Thermo Fisher         |
| Gentamicin                                                                   | 50 µg/ml    | Thermo Fisher         |
| <b>Cancer medium</b>                                                         |             |                       |
| Advanced DMEM/F-12                                                           |             | Thermo Fisher         |
| Penicillin-streptomycin solution (100 x)                                     | 1 x         | Nacalai Tesque        |
| L-Glutamine                                                                  | 2 mM        | Nacalai Tesque        |
| Y27632                                                                       | 10 µM       | R&D systems           |
| SB431542                                                                     | 1 µM        | R&D systems           |
| Plasmocin                                                                    | 5 µg/ml     | Invivogen             |
| Fetal bovine serum                                                           | 5%          | Thermo Fisher         |
| Epidermal growth factor (EGF)                                                | 50 ng/ml    | Peprotech             |
| Fibroblast growth factor 2 (FGF2)                                            | 100 ng/ml   | Peprotech             |
| 5'-(N-Ethyl-carboxamido)-adenosine (NECA)                                    | 1 µM        | Sigma-Aldrich         |
| B27 supplement (50 x)                                                        | 1 x         | Thermo Fisher         |
| L-WRN conditioned medium <sup>a</sup>                                        | 5%          | In-house <sup>b</sup> |
| <sup>a</sup> L-WRN conditioned medium was added after the protocol revision. |             |                       |
| <sup>b</sup> Also available from Sigma-Aldrich (SCM105)                      |             |                       |
| <b>eL-WRN medium</b>                                                         |             |                       |
| Advanced DMEM/F-12                                                           |             | Thermo Fisher         |
| Penicillin-streptomycin solution (100 x)                                     | 1 x         | Nacalai Tesque        |
| L-Glutamine                                                                  | 2 mM        | Nacalai Tesque        |
| L-WRN conditioned medium                                                     | 50%         | In-house <sup>b</sup> |
| Y27632                                                                       | 10 µM       | R&D systems           |
| SB431542                                                                     | 1 µM        | R&D systems           |
| Plasmocin                                                                    | 5 µg/ml     | Invivogen             |
| Fetal bovine serum                                                           | 20%         | Thermo Fisher         |
| Epidermal growth factor (EGF)                                                | 50 ng/ml    | Peprotech             |

**Supplementary table 2:** Success rates for spheroid establishment according to the clinicopathological characteristics of patients in the first patient cohort.

|                                 | Succeeded    | Failed       | Success rate (%) | <i>P</i> value <sup>a</sup> |
|---------------------------------|--------------|--------------|------------------|-----------------------------|
| Total (n = 71)                  | 18           | 53           | 25               |                             |
| Age, median (range)             | 73.6 (59–87) | 69.5 (39–88) |                  | <i>P</i> = 0.40             |
| <60                             | 1            | 11           | 8                |                             |
| 60–69                           | 5            | 13           | 28               |                             |
| 70–79                           | 8            | 15           | 35               |                             |
| ≥80                             | 4            | 14           | 22               |                             |
| Sex                             |              |              |                  | <i>P</i> = 0.78             |
| Male                            | 10           | 32           | 24               |                             |
| Female                          | 8            | 21           | 28               |                             |
| Stage                           |              |              |                  | <i>P</i> = 0.92             |
| IA                              | 2            | 6            | 25               |                             |
| IB                              | 0            | 2            | 0                |                             |
| IIA                             | 5            | 9            | 36               |                             |
| IIB                             | 4            | 10           | 29               |                             |
| IIIA                            | 3            | 9            | 25               |                             |
| IIIB                            | 2            | 12           | 14               |                             |
| IIIC                            | 2            | 5            | 29               |                             |
| IV                              | 0            | 0            | NA               |                             |
| Tumor invasion                  |              |              |                  | <i>P</i> = 0.73             |
| T1                              | 3            | 8            | 27               |                             |
| T2                              | 2            | 4            | 33               |                             |
| T3                              | 9            | 22           | 29               |                             |
| T4                              | 4            | 19           | 17               |                             |
| LN metastasis                   |              |              |                  | <i>P</i> = 0.55             |
| N0                              | 5            | 18           | 22               |                             |
| N1                              | 6            | 9            | 40               |                             |
| N2                              | 3            | 8            | 27               |                             |
| N3a                             | 2            | 13           | 13               |                             |
| N3b                             | 2            | 5            | 29               |                             |
| Lauren's classification         |              |              |                  | <i>P</i> = 0.02             |
| Intestinal                      | 16           | 30           | 35               |                             |
| Diffuse                         | 2            | 23           | 8                |                             |
| Location                        |              |              |                  | <i>P</i> = 0.06             |
| GE junction                     | 2            | 0            | 100              |                             |
| Fundus                          | 4            | 6            | 40               |                             |
| Corpus                          | 5            | 25           | 17               |                             |
| Antrum                          | 7            | 22           | 24               |                             |
| Metastasis at initial diagnosis |              |              |                  | <i>P</i> = 1.00             |
| Yes                             | 2            | 5            | 29               |                             |
| No                              | 16           | 48           | 25               |                             |
| Chemotherapy                    |              |              |                  | <i>P</i> = 1.00             |
| Before surgery                  | 2            | 8            | 20               |                             |
| No treatment                    | 16           | 45           | 26               |                             |

<sup>a</sup>Fisher's exact test

**Supplementary table 3:** Success rates for spheroid establishment according to the clinicopathological characteristics of patients in the second patient cohort.

|                                 | Succeeded  | Failed       | Success rate (%) | <i>P</i> value <sup>a</sup> |
|---------------------------------|------------|--------------|------------------|-----------------------------|
| Total (n = 33)                  | 29         | 4            | 88               |                             |
| Age, median (range)             | 79 (60-86) | 76.5 (72-93) |                  | <i>P</i> = 1.00             |
| <60                             | 0          | 0            | NA               |                             |
| 60–69                           | 5          | 0            | 100              |                             |
| 70–79                           | 11         | 3            | 79               |                             |
| ≥80                             | 13         | 1            | 93               |                             |
| Sex                             |            |              |                  | <i>P</i> = 1.00             |
| Male                            | 19         | 3            | 86               |                             |
| Female                          | 10         | 1            | 91               |                             |
| Stage                           |            |              |                  | <i>P</i> = 1.00             |
| IA                              | 6          | 0            | 100              |                             |
| IB                              | 1          | 0            | 100              |                             |
| IIA                             | 8          | 2            | 80               |                             |
| IIB                             | 6          | 0            | 100              |                             |
| IIIA                            | 1          | 1            | 50               |                             |
| IIIB                            | 5          | 1            | 83               |                             |
| IIIC                            | 2          | 0            | 100              |                             |
| IV                              | 0          | 0            | NA               |                             |
| Tumor invasion                  |            |              |                  | <i>P</i> = 1.00             |
| T1                              | 8          | 0            | 100              |                             |
| T2                              | 7          | 1            | 88               |                             |
| T3                              | 8          | 3            | 73               |                             |
| T4                              | 6          | 0            | 100              |                             |
| LN metastasis                   |            |              |                  | <i>P</i> = 1.00             |
| N0                              | 12         | 2            | 86               |                             |
| N1                              | 4          | 0            | 100              |                             |
| N2                              | 6          | 0            | 100              |                             |
| N3a                             | 5          | 2            | 71               |                             |
| N3b                             | 2          | 0            | 100              |                             |
| Lauren's classification         |            |              |                  | <i>P</i> = 1.00             |
| Intestinal                      | 23         | 3            | 88               |                             |
| Diffuse                         | 6          | 1            | 86               |                             |
| Location                        |            |              |                  | <i>P</i> = 1.00             |
| GE junction                     | 1          | 0            | 100              |                             |
| Fundus                          | 6          | 0            | 100              |                             |
| Corpus                          | 8          | 2            | 80               |                             |
| Antrum                          | 14         | 2            | 88               |                             |
| Metastasis at initial diagnosis |            |              |                  | <i>P</i> = 0.23             |
| Yes                             | 1          | 1            | 50               |                             |
| No                              | 28         | 3            | 90               |                             |
| Chemotherapy                    |            |              |                  | <i>P</i> = 0.33             |
| Before surgery                  | 2          | 1            | 67               |                             |
| No treatment                    | 27         | 3            | 90               |                             |

<sup>a</sup>Fisher's exact test

**Supplementary table 4: Mutational status of 409 cancer-related genes in each gastric cancer stem cell (GC-SC) spheroid line in the first patient cohort detected using targeted next-generation sequencing.**

| Chrom                   | Position  | Ref | Variant | Frequency | Type | Allele Name | Gene Symbol <sup>a</sup> | AAChange.refGene                            |
|-------------------------|-----------|-----|---------|-----------|------|-------------|--------------------------|---------------------------------------------|
| <b>HG1T</b>             |           |     |         |           |      |             |                          |                                             |
| chr3                    | 187451403 | T   | C       | 41.2      | SNV  | ---         | BCL6                     | NM_001706:exon3:c.79A>G;p.S27G              |
| chr4                    | 62845473  | A   | C       | 63.6      | SNV  | ---         | ADGRL3                   | NM_015236:exon17:c.2794A>C;p.N932H          |
| chr5                    | 112163677 | A   | T       | 37.2      | SNV  | COSM18768   | APC                      | NM_000038:exon13:c.1600A>T;p.K534X          |
| chr5                    | 112175303 | C   | T       | 62.8      | SNV  | COSM13129   | APC                      | NM_000038:exon16:c.4012C>T;p.Q1338X         |
| chr6                    | 134492239 | A   | -       | 67.6      | DEL  | ---         | SGK1                     | NM_005627:exon10:c.960delT;p.I320fs         |
| chr6                    | 152476033 | T   | A       | 69.5      | SNV  | ---         | SYNE1                    | NM_033071:exon132:c.23910A>T;p.K7970N       |
| chr6                    | 166826287 | C   | T       | 35.4      | SNV  | ---         | RPS6KA2                  | NM_021135:exon21:c.2165G>A;p.R722H          |
| chr7                    | 151879573 | T   | C       | 30.8      | SNV  | ---         | KMT2C                    | NM_170606:exon36:c.5372A>G;p.Q1791R         |
| chr9                    | 134067664 | C   | A       | 45.8      | SNV  | ---         | NUP214                   | NM_005085:exon27:c.3644C>A;p.S1215X         |
| chr11                   | 3723971   | G   | C       | 51.2      | SNV  | ---         | NUP98                    | NM_016320:exon23:c.3234C>G;p.F1078L         |
| chr12                   | 56488301  | A   | G       | 33.9      | SNV  | ---         | ERBB3                    | NM_001982:exon15:c.1820A>G;p.Q607R          |
| chr17                   | 7577538   | C   | T       | 97.7      | SNV  | COSM10662   | TP53                     | NM_000546:exon7:c.743G>A;p.R248Q            |
| chr22                   | 28195386  | C   | A       | 52.5      | SNV  | ---         | MN1                      | NM_002430:exon1:c.1146G>T;p.Q382H           |
| <b>HG2T<sup>b</sup></b> |           |     |         |           |      |             |                          |                                             |
| chr5                    | 112175952 | -   | A       | 100.0     | INS  | COSM19695   | APC                      | NM_000038:exon16:c.4662dupA;p.E1554fs       |
| chr10                   | 88649927  | T   | A       | 95.2      | SNV  | COSM9548662 | BMPR1A                   | NM_004329:exon4:c.176T>A;p.L59X             |
| chr17                   | 7578223   | C   | T       | 100.0     | SNV  | COSM45995   | TP53                     | NM_000546:exon6:c.626G>A;p.R209K            |
| chr18                   | 50278486  | A   | C       | 21.6      | SNV  | ---         | DCC                      | NM_005215:exon2:c.154A>C;p.M52L             |
| <b>HG3T<sup>b</sup></b> |           |     |         |           |      |             |                          |                                             |
| chr1                    | 27023831  | G   | -       | 52.6      | DEL  | ---         | ARID1A                   | NM_006015:exon1:c.937delG;p.G313fs          |
| chr1                    | 27105617  | C   | T       | 52.9      | SNV  | ---         | ARID1A                   | NM_006015:exon20:c.5228C>T;p.T1743M         |
| chr1                    | 145532152 | G   | A       | 49.6      | SNV  | ---         | ITGA10                   | NM_003637:exon8:c.796G>A;p.E266K            |
| chr1                    | 147092593 | T   | C       | 49.2      | SNV  | ---         | BCL9                     | NM_004326:exon8:c.2632T>C;p.S878P           |
| chr1                    | 220808833 | TC  | -       | 50.1      | DEL  | ---         | MARK1                    | NM_018650:exon12:c.1238_1239del;p.I413fs    |
| chr2                    | 29451873  | C   | T       | 50.8      | SNV  | ---         | ALK                      | NM_004304:exon16:c.2692G>A;p.E898K          |
| chr3                    | 30691872  | A   | -       | NA        | DEL  | ---         | TGFBR2                   | NM_003242:exon3;c.657Adel;p.K128fs          |
| chr3                    | 52442539  | G   | A       | 97.7      | SNV  | ---         | BAP1                     | NM_004656:exon4:c.206C>T;p.T69M             |
| chr3                    | 138461565 | C   | T       | 44.0      | SNV  | ---         | PIK3CB                   | NM_006219:exon3:c.456G>A;p.M152I            |
| chr3                    | 178952085 | A   | G       | 48.5      | SNV  | COSM94986   | PIK3CA                   | NM_006218:exon21:c.3140A>G;p.H1047R         |
| chr4                    | 55152009  | G   | A       | 50.9      | SNV  | ---         | PDGFRA                   | NM_006206:exon18:c.2441G>A;p.C814Y          |
| chr4                    | 62936601  | C   | T       | 48.7      | SNV  | ---         | ADGRL3                   | NM_015236:exon25:c.4385C>T;p.P1462L         |
| chr5                    | 226052    | C   | T       | 50.3      | SNV  | ---         | SDHA                     | NM_004168:exon5:c.511C>T;p.R171C            |
| chr5                    | 176524337 | G   | T       | 49.5      | SNV  | ---         | FGFR4                    | NM_002011:exon17:c.2198G>T;p.R733M          |
| chr6                    | 31132590  | C   | T       | 57.5      | SNV  | ---         | POU5F1                   | NM_002701:exon5:c.871G>A;p.D291N            |
| chr6                    | 31138020  | CTT | -       | 48.1      | DEL  | ---         | POU5F1                   | NM_002701:exon1:c.376_378del;p.126_126del   |
| chr6                    | 33287889  | TCT | -       | 46.1      | DEL  | ---         | DAXX                     | NM_001350:exon5:c.1362_1364del;p.454_455del |
| chr6                    | 41555186  | C   | -       | 56.0      | DEL  | ---         | FOXP4                    | NM_138457:exon7:c.805delC;p.P269fs          |
| chr6                    | 56327860  | G   | A       | 51.0      | SNV  | ---         | DST                      | NM_015548:exon82:c.15113C>T;p.P5038L        |
| chr6                    | 56462752  | A   | -       | 52.2      | DEL  | ---         | DST                      | NM_015548:exon28:c.4112delT;p.L1371fs       |
| chr6                    | 135518423 | C   | T       | 50.0      | SNV  | ---         | MYB                      | NM_001130173:exon10:c.1528C>T;p.R510C       |

|       |           |    |   |       |     |     |         |                                          |
|-------|-----------|----|---|-------|-----|-----|---------|------------------------------------------|
| chr7  | 2968323   | G  | - | 58.8  | DEL | --- | CARD11  | NM_032415:exon13:c.1663delC:p.R555fs     |
| chr8  | 145737431 | C  | T | 35.0  | SNV | --- | RECQL4  | NM_004260:exon20:c.3256G>A:p.G1086R      |
| chr8  | 145738671 | T  | C | 29.3  | SNV | --- | RECQL4  | NM_004260:exon15:c.2393A>G:p.Y798C       |
| chr8  | 145739409 | T  | C | 37.9  | SNV | --- | RECQL4  | NM_004260:exon12:c.1961A>G:p.Q654R       |
| chr9  | 120476084 | -  | A | 29.4  | INS | --- | TLR4    | NM_003266:exon4:c.1558dupA:p.S519fs      |
| chr9  | 134039290 | T  | - | 53.3  | DEL | --- | NUP214  | NM_005085:exon20:c.2757delT:p.A919fs     |
| chr9  | 135801117 | C  | A | 45.8  | SNV | --- | TSC1    | NM_000368:exon5:c.220G>T:p.D74Y          |
| chr9  | 136901405 | T  | C | 48.1  | SNV | --- | BRD3    | NM_007371:exon10:c.1685A>G:p.D562G       |
| chr10 | 76739022  | A  | G | 51.1  | SNV | --- | KAT6B   | NM_012330:exon10:c.2156A>G:p.Y719C       |
| chr12 | 46246012  | G  | A | 44.1  | SNV | --- | ARID2   | NM_152641:exon15:c.4106G>A:p.G1369D      |
| chr12 | 49431874  | C  | - | 61.7  | DEL | --- | KMT2D   | NM_003482:exon34:c.9265delG:p.V3089fs    |
| chr13 | 110435906 | C  | T | 47.8  | SNV | --- | IRS2    | NM_003749:exon1:c.2495G>A:p.R832H        |
| chr14 | 92471207  | -  | T | 47.2  | INS | --- | TRIP11  | NM_004239:exon11:c.3113dupA:p.K1038fs    |
| chr15 | 40913546  | AC | - | 55.3  | DEL | --- | KNL1    | NM_144508:exon10:c.1084_1085del:p.T362fs |
| chr16 | 23647028  | T  | - | 52.0  | DEL | --- | PALB2   | NM_024675:exon4:c.839delA:p.N280fs       |
| chr16 | 50828253  | T  | C | 49.9  | SNV | --- | CYLD    | NM_015247:exon19:c.2600T>C:p.I867T       |
| chr16 | 68857418  | G  | A | 51.6  | SNV | --- | CDH1    | NM_004360:exon13:c.2053G>A:p.V685M       |
| chr17 | 29556478  | G  | T | 49.2  | SNV | --- | NF1     | NM_000267:exon21:c.2845G>T:p.G949X       |
| chr17 | 78262019  | -  | C | 28.2  | INS | --- | RNF213  | NM_020954:exon4:c.667dupC:p.G222fs       |
| chr17 | 78301694  | A  | G | 49.9  | SNV | --- | RNF213  | NM_001256071:exon19:c.3272A>G:p.K1091R   |
| chr18 | 22807087  | -  | A | 53.1  | INS | --- | ZNF521  | NM_015461:exon4:c.795dupT:p.A266fs       |
| chr18 | 50976892  | C  | - | 78.7  | DEL | --- | DCC     | NM_005215:exon23:c.3253delC:p.P1085fs    |
| chr19 | 11141427  | G  | - | 50.5  | DEL | --- | SMARCA4 | NM_003072:exon25:c.3404delG:p.R1135fs    |
| chr19 | 18870879  | -  | G | 28.7  | INS | --- | CRTC1   | NM_015321:exon8:c.727dupG:p.G243fs       |
| chr19 | 45856398  | G  | A | 48.0  | SNV | --- | ERCC2   | NM_000400:exon19:c.1774C>T:p.R592C       |
| chr19 | 52725449  | A  | G | 37.3  | SNV | --- | PPP2R1A | NM_014225:exon13:c.1616A>G:p.N539S       |
| chrX  | 44928908  | C  | T | 99.2  | SNV | --- | KDM6A   | NM_021140:exon17:c.2008C>T:p.Q670X       |
| chrX  | 48121199  | A  | C | 100.0 | SNV | --- | SSX1    | NA (splicing)                            |
| chrX  | 66765779  | G  | - | 100.0 | DEL | --- | AR      | NM_000044:exon1:c.791delG:p.R264fs       |

---

**HG4T**

|       |          |    |    |       |     |           |       |                                     |
|-------|----------|----|----|-------|-----|-----------|-------|-------------------------------------|
| chr2  | 29543662 | AT | GC | 56.1  | MNV | ---       | ALK   | NM_004304:exon7:c.1500_1501GC       |
| chr7  | 92734452 | T  | A  | 53.5  | SNV | ---       | SAMD9 | NM_017654:exon3:c.959A>T:p.Y320F    |
| chr9  | 93627378 | C  | T  | 35.0  | SNV | ---       | SYK   | NM_003177:exon6:c.845C>T:p.A282V    |
| chr10 | 43600607 | C  | A  | 61.2  | SNV | COSM95173 | RET   | NM_020630:exon4:c.833delC:p.T278fs  |
| chr11 | 47259484 | G  | A  | 29.0  | SNV | ---       | DDB2  | NM_000107:exon8:c.1120G>A:p.V374M   |
| chr17 | 7577120  | C  | G  | 100.0 | SNV | COSM43896 | TP53  | NM_000546:exon8:c.818G>C:p.R273P    |
| chr22 | 41564594 | T  | C  | 100.0 | SNV | ---       | EP300 | NM_001429:exon24:c.4016T>C:p.M1339T |

---

**HG5T<sup>b</sup>**

|       |           |    |    |       |     |             |        |                                        |
|-------|-----------|----|----|-------|-----|-------------|--------|----------------------------------------|
| chr5  | 112174494 | C  | A  | 100.0 | SNV | COSM4166493 | APC    | NM_000038:exon16:c.3203C>A:p.S1068X    |
| chr8  | 48776032  | T  | A  | 21.9  | SNV | ---         | PRKDC  | NM_006904:exon42:c.5688A>T:p.E1893V    |
| chr9  | 134019700 | C  | G  | 26.2  | SNV | ---         | NUP214 | NM_005085:exon12:c.1328C>G:p.A443G     |
| chr11 | 102195701 | TT | CA | 56.5  | MNV | ---         | BIRC3  | NM_001165:exon2:c.461_462TT>CA:p.F154S |
| chr17 | 7577117   | A  | G  | 100.0 | SNV | COSM44393   | TP53   | NM_000546:exon8:c.821T>C:p.V274A       |
| chrX  | 76939580  | G  | A  | 50.4  | SNV | ---         | ATRX   | NM_000489:exon9:c.1168C>T:p.R390C      |

---

**HG6T**

|      |          |   |   |      |     |     |      |                                  |
|------|----------|---|---|------|-----|-----|------|----------------------------------|
| chr1 | 19018313 | C | T | 50.3 | SNV | --- | PAX7 | NM_013945:exon5:c.646C>T:p.R216X |
|------|----------|---|---|------|-----|-----|------|----------------------------------|

|       |           |   |   |      |     |           |       |                                    |
|-------|-----------|---|---|------|-----|-----------|-------|------------------------------------|
| chr3  | 46490413  | C | T | 53.8 | SNV | ---       | LTF   | NM_002343:exon9:c.1153G>A:p.E385K  |
| chr6  | 41564936  | A | G | 38.9 | SNV | ---       | FOXP4 | NM_138457:exon15:c.1642A>G:p.M548V |
| chr14 | 81609793  | G | T | 63.0 | SNV | ---       | TSHR  | NM_000369:exon10:c.1391G>T:p.G464V |
| chr17 | 7578212   | G | A | 99.2 | SNV | COSM10654 | TP53  | NM_000546:exon6:c.637C>T:p.R213X   |
| chr17 | 37881332  | G | A | 96.9 | SNV | COSM14065 | ERBB2 | NM_004448:exon21:c.2524G>A:p.V842I |
| chrX  | 110366374 | C | T | 42.3 | SNV | ---       | PAK3  | NM_002578:exon5:c.43C>T:p.P15S     |

#### HG7T<sup>b</sup>

|       |           |                  |   |       |     |             |        |                                           |
|-------|-----------|------------------|---|-------|-----|-------------|--------|-------------------------------------------|
| chr2  | 216272884 | A                | C | 46.7  | SNV | ---         | FN1    | NM_002026:exon17:c.2465T>G:p.V822G        |
| chr3  | 41266113  | C                | A | 46.4  | SNV | COSM5666    | CTNNB1 | NM_001904:exon3:c.110C>A:p.S37Y           |
| chr6  | 117687341 | T                | C | 72.0  | SNV | ---         | ROS1   | NM_002944:exon18:c.2710A>G:p.I904V        |
| chr6  | 152540143 | A                | C | 22.3  | SNV | ---         | SYNE1  | NM_033071:exon119:c.21826T>G:p.L7276V     |
| chr7  | 2987388   | G                | A | 78.9  | SNV | COSM452940  | CARD11 | NM_032415:exon3:c.41C>T:p.T14M            |
| chr7  | 106509517 | C                | G | 28.0  | SNV | ---         | PIK3CG | NM_002649:exon2:c.1511C>G:p.S504C         |
| chr7  | 128851988 | C                | T | 24.2  | SNV | COSM5020286 | SMO    | NM_005631:exon12:c.2060C>T:p.P687L        |
| chr9  | 21971007  | CAGGTCCA<br>CGGG | - | 100.0 | DEL | ---         | CDKN2A | NM_000077:exon2:c.340_351del:p.114_117del |
| chr14 | 95569756  | G                | A | 48.4  | SNV | ---         | DICER1 | NM_030621:exon23:c.3977C>T:p.A1326V       |
| chr16 | 15931862  | T                | C | 32.2  | SNV | ---         | MYH11  | NM_002474:exon2:c.248A>G:p.K83R           |
| chr17 |           |                  |   | 100.0 |     |             | TP53   | Large deletion <sup>c</sup>               |
| chr19 | 18280013  | C                | A | 45.2  | SNV | ---         | PIK3R2 | NM_005027:exon16:c.2096C>A:p.A699D        |
| chr20 | 57480528  | G                | A | 59.1  | SNV | ---         | GNAS   | NM_000516:exon6:c.523G>A:p.A175T          |
| chrX  | 100608246 | C                | T | 99.0  | SNV | ---         | BTK    | NM_000061:exon18:c.1844G>A:p.R615H        |

#### HG8T

No mutations in 409 cancer-related genes.

#### HG9T

|       |          |   |   |      |     |           |         |                                     |
|-------|----------|---|---|------|-----|-----------|---------|-------------------------------------|
| chr5  | 7875383  | C | A | 30.6 | SNV | ---       | MTRR    | NM_002454:exon4:c.296C>A:p.S99X     |
| chr8  | 71053424 | T | A | 74.0 | SNV | ---       | NCOA2   | NM_006540:exon14:c.3023A>T:p.N1008I |
| chr11 | 3752675  | A | G | 51.9 | SNV | ---       | NUP98   | NM_005387:exon14:c.1727T>C:p.F576S  |
| chr15 | 41797675 | G | A | 94.5 | SNV | ---       | LTK     | NM_002344:exon14:c.1751C>T:p.T584I  |
| chr17 | 7577126  | T | A | 95.0 | SNV | COSM44469 | TP53    | NM_000546:exon8:c.812A>T:p.E271V    |
| chr19 | 11143994 | G | A | 50.2 | SNV | ---       | SMARCA4 | NM_003072:exon26:c.3575G>A:p.R1192H |
| chr20 | 57430299 | G | A | 24.0 | SNV | ---       | GNAS    | NM_080425:exon1:c.1979G>A:p.R660H   |

#### HG10T

|      |           |    |   |      |     |     |        |                                      |
|------|-----------|----|---|------|-----|-----|--------|--------------------------------------|
| chr1 | 145532231 | G  | A | 38.3 | SNV | --- | ITGA10 | NM_003637:exon8:c.875G>A:p.C292Y     |
| chr1 | 145537735 | AG | - | 38.7 | DEL | --- | ITGA10 | NA (splicing)                        |
| chr1 | 179090821 | A  | G | 48.8 | SNV | --- | ABL2   | NM_005158:exon5:c.824T>C:p.M275T     |
| chr1 | 220835187 | G  | T | 46.9 | SNV | --- | MARK1  | NM_018650:exon18:c.2067G>T:p.K689N   |
| chr2 | 148672772 | C  | - | 52.1 | DEL | --- | ACVR2A | NM_001616:exon5:c.541delC:p.P181fs   |
| chr2 | 223161776 | C  | T | 49.9 | SNV | --- | PAX3   | NM_000438:exon2:c.242G>A:p.G81D      |
| chr3 | 142280211 | A  | G | 33.6 | SNV | --- | ATR    | NM_001184:exon5:c.1223T>C:p.I408T    |
| chr3 | 195593784 | C  | T | 33.3 | SNV | --- | TNK2   | NM_005781:exon14:c.3086G>A:p.G1029D  |
| chr4 | 55151647  | A  | - | 52.0 | DEL | --- | PDGFRA | NM_006206:exon17:c.2433delA:p.S811fs |
| chr4 | 153247175 | -  | T | 49.8 | INS | --- | FBXW7  | NM_018315:exon9:c.1387dupA:p.R463fs  |
| chr5 | 180058748 | G  | - | 43.1 | DEL | --- | FLT4   | NM_002020:exon2:c.89delC:p.P30fs     |
| chr6 | 41555186  | C  | - | 44.1 | DEL | --- | FOXP4  | NM_138457:exon7:c.805delC:p.P269fs   |



|       |           |     |   |       |     |           |          |                                                  |
|-------|-----------|-----|---|-------|-----|-----------|----------|--------------------------------------------------|
| chr6  | 51612648  | G   | A | 50.4  | SNV | ---       | PKHD1    | NM_170724:exon58:c.9766C>T;p.P3256S              |
| chr6  | 70048837  | C   | T | 49.0  | SNV | ---       | ADGRB3   | NM_001704:exon25:c.3218C>T;p.T1073M              |
| chr6  | 106547205 | A   | G | 38.8  | SNV | ---       | PRDM1    | NM_001198:exon4:c.442A>G;p.I148V                 |
| chr6  | 135507123 | C   | T | 52.3  | SNV | ---       | MYB      | NM_005375:exon2:c.106C>T;p.R36C                  |
| chr6  | 152472716 | T   | A | 48.6  | SNV | ---       | SYNE1    | NM_033071:exon134:c.24209A>T;p.D8070V            |
| chr8  | 41791555  | C   | T | 29.8  | SNV | ---       | KAT6A    | NM_006766:exon17:c.4183G>A;p.D1395N              |
| chr8  | 48689466  | G   | - | 22.1  | DEL | ---       | PRKDC    | NM_006904:exon85:c.12127delC;p.P4040fs           |
| chr8  | 92983013  | G   | A | 34.0  | SNV | COSM33136 | RUNX1T1  | NM_004349:exon10:c.1331C>T;p.A444V               |
| chr8  | 92983068  | C   | T | 34.8  | SNV | ---       | RUNX1T1  | NM_004349:exon10:c.1276G>A;p.V426I               |
| chr9  | 133760106 | C   | T | 49.4  | SNV | ---       | ABL1     | NM_005157:exon11:c.2429C>T;p.P810L               |
| chr12 | 46215214  | T   | - | 26.5  | DEL | ---       | ARID2    | NM_152641:exon6:c.649delT;p.F217fs               |
| chr12 | 46243853  | T   | - | 45.6  | DEL | ---       | ARID2    | NM_152641:exon15:c.1947delT;p.H649fs             |
| chr12 | 49430935  | GCT | - | 34.3  | DEL | ---       | KMT2D    | NM_003482:exon34:c.10202_10204del:p.3401_3402del |
| chr12 | 49443503  | G   | A | 49.9  | SNV | ---       | KMT2D    | NM_003482:exon11:c.3868C>T;p.R1290W              |
| chr12 | 49444842  | G   | T | 51.9  | SNV | ---       | KMT2D    | NM_003482:exon10:c.2624C>A;p.P875H               |
| chr12 | 121432117 | GC  | - | 43.5  | DEL | ---       | HNF1A    | NM_000545:exon4:c.864_865del;p.G288fs            |
| chr12 | 121432118 | CC  | - | 56.5  | DEL | ---       | HNF1A    | NM_000545:exon4:c.865_866del;p.P289fs            |
| chr13 | 110435136 | C   | G | 43.2  | SNV | ---       | IRS2     | NM_003749:exon1:c.3265G>C;p.A1089P               |
| chr14 | 102551189 | CTT | - | 48.4  | DEL | ---       | HSP90AA1 | NM_005348:exon5:c.806_808del;p.269_270del        |
| chr15 | 88726662  | G   | T | 47.5  | SNV | ---       | NTRK3    | NM_002530:exon5:c.382C>A;p.H128N                 |
| chr17 | 8110652   | C   | T | 49.3  | SNV | ---       | AURKB    | NM_001313955:exon4:c.17G>A;p.G6D                 |
| chr17 | 41607297  | G   | A | 49.1  | SNV | ---       | ETV4     | NM_001986:exon10:c.910C>T;p.R304X                |
| chr17 | 75478295  | C   | T | 52.8  | SNV | ---       | SEPT9    | NM_006640:exon3:c.737C>T;p.A246V                 |
| chr18 | 59195372  | A   | T | 100.0 | SNV | ---       | CDH20    | NM_031891:exon7:c.1190A>T;p.E397V                |
| chr19 | 11144149  | C   | T | 54.2  | SNV | ---       | SMARCA4  | NM_003072:exon26:c.3730C>T;p.R1244C              |
| chr20 | 31022281  | C   | A | 52.5  | SNV | ---       | ASXL1    | NM_015338:exon12:c.1766C>A;p.P589H               |
| chrX  | 41075161  | G   | A | 46.3  | SNV | ---       | USP9X    | NM_001039590:exon35:c.5341G>A;p.V1781I           |
| chrX  | 153762700 | C   | T | 44.5  | SNV | ---       | G6PD     | NM_000402:exon6:c.587G>A;p.R196H                 |

---

HGI1T

|       |          |   |   |       |     |           |        |                                     |
|-------|----------|---|---|-------|-----|-----------|--------|-------------------------------------|
| chr1  | 45795081 | G | A | 68.7  | SNV | ---       | MUTYH  | NM_012222:exon16:c.1538C>T;p.P513L  |
| chr2  | 24952578 | T | C | 27.4  | SNV | ---       | NCOA1  | NM_003743:exon15:c.3095T>C;p.F1032S |
| chr4  | 62936411 | C | A | 47.2  | SNV | ---       | ADGRL3 | NM_015236:exon25:c.4195C>A;p.Q1399K |
| chr15 | 66729181 | A | G | 62.2  | SNV | ---       | MAP2K1 | NM_002755:exon3:c.389A>G;p.Y130C    |
| chr17 | 7578263  | G | A | 100.0 | SNV | COSM10705 | TP53   | NM_000546:exon6:c.586C>T;p.R196X    |
| chr17 | 37880257 | C | G | 100.0 | SNV | COSM51317 | ERBB2  | NM_004448:exon19:c.2301C>G;p.I767M  |

---

HGI2T

|       |           |   |   |      |     |     |        |                                       |
|-------|-----------|---|---|------|-----|-----|--------|---------------------------------------|
| chr1  | 162725039 | G | A | 40.8 | SNV | --- | DDR2   | NM_006182:exon6:c.511G>A;p.D171N      |
| chr2  | 141459833 | C | T | 49.0 | SNV | --- | LRP1B  | NM_018557:exon39:c.6179G>A;p.R2060H   |
| chr6  | 152129391 | C | T | 56.5 | SNV | --- | ESR1   | NM_000125:exon1:c.344C>T;p.P115L      |
| chr6  | 152129451 | A | G | 41.8 | SNV | --- | ESR1   | NM_000125:exon1:c.404A>G;p.E135G      |
| chr6  | 152472810 | G | A | 47.2 | SNV | --- | SYNE1  | NM_033071:exon134:c.24115C>T;p.R8039C |
| chr6  | 152532711 | C | T | 46.0 | SNV | --- | SYNE1  | NM_033071:exon123:c.22294G>A;p.E7432K |
| chr7  | 2946337   | C | T | 59.7 | SNV | --- | CARD11 | NM_032415:exon25:c.3400G>A;p.V1134I   |
| chr16 | 65005506  | T | G | 24.2 | SNV | --- | CDH11  | NM_001797:exon11:c.1618A>C;p.N540H    |
| chr16 | 66426109  | G | A | 53.8 | SNV | --- | CDH5   | NM_001795:exon7:c.1040G>A;p.R347Q     |
| chr16 | 68863616  | C | G | 51.4 | SNV | --- | CDH1   | NM_004360:exon15:c.2355C>G;p.N785K    |
| chr17 | 37868208  | C | A | 58.1 | SNV | --- | ERBB2  | NM_004448:exon8:c.929C>A;p.S310Y      |

|       |           |   |   |      |     |            |        |                                       |
|-------|-----------|---|---|------|-----|------------|--------|---------------------------------------|
| chr19 | 18279669  | G | A | 57.0 | SNV | ---        | PIK3R2 | NM_005027:exon15:c.1942G>A;p.E648K    |
| HG13T |           |   |   |      |     |            |        |                                       |
| chr1  | 162724541 | C | T | 44.1 | SNV | ---        | DDR2   | NM_006182:exon5:c.313C>T;p.R105C      |
| chr1  | 185069410 | G | A | 40.2 | SNV | ---        | RNF2   | NM_007212:exon7:c.988G>A;p.A330T      |
| chr1  | 241680541 | C | T | 44.0 | SNV | ---        | FH     | NM_000143:exon2:c.208G>A;p.A70T       |
| chr2  | 141294155 | T | A | 51.5 | SNV | ---        | LRP1B  | NM_018557:exon46:c.7637A>T;p.Y2546F   |
| chr2  | 148683686 | A | - | 57.7 | DEL | ---        | ACVR2A | NM_001616:exon10:c.1304delA;p.K435fs  |
| chr2  | 216292965 | G | A | 57.6 | SNV | ---        | FN1    | NM_054034:exon6:c.782C>T;p.T261I      |
| chr2  | 223163270 | C | T | 31.6 | SNV | ---        | PAX3   | NM_000438:exon1:c.65G>A;p.R22H        |
| chr3  | 37090443  | T | C | 89.9 | SNV | ---        | MLH1   | NM_000249:exon18:c.2038T>C;p.C680R    |
| chr3  | 187447511 | G | A | 26.1 | SNV | ---        | BCL6   | NM_001706:exon5:c.682C>T;p.R228W      |
| chr5  | 180047947 | G | A | 45.7 | SNV | ---        | FLT4   | NM_002020:exon15:c.2228C>T;p.A743V    |
| chr6  | 56476324  | A | - | 58.3 | DEL | ---        | DST    | NM_015548:exon24:c.3518delT;p.L1173fs |
| chr6  | 117609728 | C | T | 52.2 | SNV | ---        | ROS1   | NM_002944:exon43:c.6971G>A;p.C2324Y   |
| chr7  | 116409799 | C | T | 47.8 | SNV | ---        | MET    | NM_000245:exon12:c.2684C>T;p.T895M    |
| chr8  | 113267554 | A | T | 49.8 | SNV | ---        | CSMD3  | NM_052900:exon60:c.9458T>A;p.I3153K   |
| chr9  | 136913503 | G | A | 78.4 | SNV | ---        | BRD3   | NM_007371:exon6:c.788C>T;p.S263L      |
| chr10 | 89693007  | A | - | 65.2 | DEL | COSM5847   | PTEN   | NM_000314:exon5:c.487delA;p.K163fs    |
| chr10 | 89725051  | T | G | 55.7 | SNV | ---        | PTEN   | NM_000314:exon9:c.1034T>G;p.L345R     |
| chr11 | 32456771  | C | T | 53.4 | SNV | ---        | WT1    | NM_000378:exon1:c.121G>A;p.A41T       |
| chr13 | 110436710 | G | A | 57.4 | SNV | ---        | IRS2   | NM_003749:exon1:c.1691C>T;p.A564V     |
| chr14 | 99642275  | G | A | 44.4 | SNV | ---        | BCL11B | NM_022898:exon3:c.685C>T;p.R229W      |
| chr14 | 99642286  | C | - | 44.4 | DEL | ---        | BCL11B | NM_022898:exon3:c.674delG;p.G225fs    |
| chr17 | 7577121   | G | A | 92.8 | SNV | COSM99933  | TP53   | NM_000546:exon8:c.817C>T;p.R273C      |
| chr17 | 29661945  | C | T | 64.1 | SNV | COSM30766  | NF1    | NM_000267:exon39:c.5839C>T;p.R1947X   |
| chr18 | 45394825  | A | - | 26.4 | DEL | ---        | SMAD2  | NM_005901:exon5:c.524delT;p.L175fs    |
| chr19 | 18278020  | G | A | 48.8 | SNV | ---        | PIK3R2 | NM_005027:exon13:c.1640G>A;p.R547Q    |
| chr20 | 57484420  | C | T | 55.6 | SNV | COSM123397 | GNAS   | NM_000516:exon8:c.601C>T;p.R201C      |
| chrX  | 48544188  | G | T | 45.2 | SNV | ---        | WAS    | NM_000377:exon4:c.426G>T;p.Q142H      |
| chrX  | 63411537  | G | A | 21.0 | SNV | ---        | AMER1  | NM_152424:exon2:c.1630C>T;p.P544S     |
| chrX  | 70627470  | C | T | 44.2 | SNV | ---        | TAF1   | NM_004606:exon27:c.4214C>T;p.T1405M   |

HG14T

|       |           |     |   |      |     |            |        |                                           |
|-------|-----------|-----|---|------|-----|------------|--------|-------------------------------------------|
| chr2  | 24914529  | G   | T | 48.7 | SNV | ---        | NCOA1  | NM_003743:exon7:c.712G>T;p.D238Y          |
| chr3  | 30713544  | AGA | - | 51.8 | DEL | ---        | TGFBR2 | NM_003242:exon4:c.869_871del;p.290_291del |
| chr3  | 52442567  | G   | A | 98.7 | SNV | ---        | BAP1   | NM_004656:exon4:c.178C>T;p.R60X           |
| chr3  | 178936091 | G   | A | 51.0 | SNV | COSM125370 | PIK3CA | NM_006218:exon10:c.1633G>A;p.E545K        |
| chr16 | 68844179  | A   | G | 98.4 | SNV | ---        | CDH1   | NM_004360:exon6:c.767A>G;p.N256S          |
| chr17 | 7578496   | A   | C | 97.3 | SNV | COSM45351  | TP53   | NM_000546:exon5:c.434T>G;p.L145R          |
| chrX  | 70674025  | G   | C | 37.3 | SNV | ---        | TAF1   | NM_004606:exon33:c.4819G>C;p.E1607Q       |

HG15T

|       |           |   |   |       |     |     |         |                                      |
|-------|-----------|---|---|-------|-----|-----|---------|--------------------------------------|
| chr2  | 219562333 | C | T | 59.4  | SNV | --- | STK36   | NM_015690:exon24:c.2909C>T;p.A970V   |
| chr3  | 89259092  | A | C | 28.0  | SNV | --- | EPHA3   | NM_005233:exon3:c.236A>C;p.N79T      |
| chr5  | 112170745 | C | - | 100.0 | DEL | --- | APC     | NM_000038:exon15:c.1841delC;p.A614fs |
| chr6  | 152675840 | C | T | 75.5  | SNV | --- | SYNE1   | NM_182961:exon67:c.10880G>A;p.R3627H |
| chr11 | 71729920  | C | T | 62.1  | SNV | --- | NUMA1   | NM_006185:exon10:c.691G>A;p.D231N    |
| chr11 | 106810667 | G | T | 63.0  | SNV | --- | GUCY1A2 | NM_000855:exon4:c.725C>A;p.P242H     |

|       |           |   |   |       |     |             |        |                                   |
|-------|-----------|---|---|-------|-----|-------------|--------|-----------------------------------|
| chr12 | 25398285  | C | T | 38.2  | SNV | COSM517     | KRAS   | NM_004985:exon2:c.34G>A:p.G12S    |
| chr16 | 14028150  | G | C | 35.3  | SNV | ---         | ERCC4  | NM_005236:exon7:c.1204G>C:p.G402R |
| chr17 | 7577094   | G | A | 100.0 | SNV | COSM10704   | TP53   | NM_000546:exon8:c.844C>T:p.R282W  |
| chr17 | 11958269  | C | T | 46.8  | SNV | ---         | MAP2K4 | NM_003010:exon2:c.179C>T:p.T60I   |
| chr18 | 48573628  | G | T | 54.9  | SNV | COSM7410653 | SMAD4  | NM_005359:exon2:c.212G>T:p.C71F   |
| chrX  | 110391010 | A | C | 45.6  | SNV | ---         | PAK3   | NM_002578:exon7:c.322A>C:p.T108P  |

HG16T

|       |           |    |    |       |     |            |         |                                       |
|-------|-----------|----|----|-------|-----|------------|---------|---------------------------------------|
| chr3  | 3209379   | G  | A  | 50.8  | SNV | ---        | CRBN    | NM_016302:exon5:c.626C>T:p.P209L      |
| chr5  | 112176017 | G  | T  | 100.0 | SNV | COSM236691 | APC     | NM_000038:exon16:c.4726G>T:p.E1576X   |
| chr6  | 152599391 | T  | A  | 50.6  | SNV | ---        | SYNE1   | NM_033071:exon97:c.18193A>T:p.K6065X, |
| chr8  | 71036145  | C  | G  | 54.7  | SNV | ---        | NCOA2   | NM_006540:exon21:c.4267G>C:p.G1423R   |
| chr8  | 113651126 | A  | C  | 51.3  | SNV | ---        | CSMD3   | NM_052900:exon20:c.3013T>G:p.F1005V   |
| chr8  | 37697642  | G  | A  | 49.2  | SNV | ---        | ADGRA2  | NM_032777:exon17:c.2515G>A:p.G839S    |
| chr10 | 104159195 | CA | TG | 42.2  | MNV | ---        | NFKB2   | NM_002502:exon13:c.1268_1269TG        |
| chr11 | 106680767 | T  | G  | 48.9  | SNV | ---        | GUCY1A2 | NM_000855:exon5:c.1644A>C:p.E548D     |
| chr17 | 5424974   | A  | G  | 100.0 | SNV | ---        | NLRP1   | NM_033004:exon13:c.3653T>C:p.L1218P   |
| chr17 | 7578449   | C  | A  | 100.0 | SNV | COSM43549  | TP53    | NM_000546:exon5:c.481G>T:p.A161S      |
| chr18 | 59217341  | A  | C  | 30.9  | SNV | ---        | CDH20   | NM_031891:exon11:c.1779A>C:p.Q593H    |
| chr20 | 40980892  | T  | G  | 50.4  | SNV | ---        | PTPR    | NM_007050:exon10:c.1594A>C:p.S532R    |
| chr21 | 39817504  | T  | G  | 91.1  | SNV | ---        | ERG     | NM_004449:exon4:c.80A>C:p.E27A        |

HG17T

|      |           |   |   |       |     |     |        |                                       |
|------|-----------|---|---|-------|-----|-----|--------|---------------------------------------|
| chr1 | 47691173  | C | T | 73.3  | SNV | --- | TAL1   | NM_003189:exon4:c.388G>A:p.A130T      |
| chr1 | 145537512 | G | A | 50.1  | SNV | --- | ITGA10 | NM_003637:exon20:c.2522G>A:p.S841N    |
| chr1 | 237058733 | G | A | 50.3  | SNV | --- | MTR    | NM_000254:exon31:c.3481G>A:p.A1161T   |
| chr2 | 5833692   | C | T | 56.5  | SNV | --- | SOX11  | NM_003108:exon1:c.839C>T:p.T280M      |
| chr2 | 140990847 | G | A | 53.1  | SNV | --- | LRP1B  | NM_018557:exon91:c.13708C>T:p.Q4570X  |
| chr2 | 141114024 | T | A | 47.3  | SNV | --- | LRP1B  | NM_018557:exon75:c.11417A>T:p.E3806V  |
| chr2 | 141625795 | G | A | 44.0  | SNV | --- | LRP1B  | NM_018557:exon26:c.4207C>T:p.R1403C   |
| chr2 | 219544700 | G | A | 51.5  | SNV | --- | STK36  | NM_015690:exon9:c.1033G>A:p.G345R     |
| chr3 | 138664876 | G | A | 61.2  | SNV | --- | FOXL2  | NM_023067:exon1:c.689C>T:p.A230V      |
| chr4 | 1807388   | C | T | 47.0  | SNV | --- | FGFR3  | NM_000142:exon12:c.1637C>T:p.T546M    |
| chr4 | 1962801   | G | A | 49.1  | SNV | --- | NSD2   | NM_133330:exon20:c.3295G>A:p.E1099K   |
| chr4 | 1978254   | C | T | 46.4  | SNV | --- | NSD2   | NM_133330:exon23:c.3674C>T:p.T1225M   |
| chr4 | 55138644  | C | T | 54.2  | SNV | --- | PDGFRA | NM_006206:exon9:c.1321C>T:p.P441S     |
| chr4 | 55970882  | C | T | 49.7  | SNV | --- | KDR    | NM_002253:exon13:c.1915G>A:p.D639N    |
| chr4 | 87968244  | G | A | 44.9  | SNV | --- | AFF1   | NM_005935:exon3:c.536G>A:p.R179Q      |
| chr5 | 176524292 | G | T | 53.3  | SNV | --- | FGFR4  | NA (splicing)                         |
| chr6 | 51612675  | C | T | 52.0  | SNV | --- | PKHD1  | NM_138694:exon58:c.9739G>A:p.V3247I   |
| chr6 | 69348958  | C | T | 37.5  | SNV | --- | ADGRB3 | NM_001704:exon3:c.391C>T:p.R131C      |
| chr6 | 152461296 | C | A | 50.5  | SNV | --- | SYNE1  | NM_033071:exon140:c.25103G>T:p.G8368V |
| chr6 | 152539487 | C | T | 48.7  | SNV | --- | SYNE1  | NM_033071:exon120:c.21883G>A:p.A7295T |
| chr7 | 13971195  | G | A | 48.2  | SNV | --- | ETV1   | NM_004956:exon9:c.734C>T:p.A245V      |
| chr7 | 98547355  | C | T | 46.4  | SNV | --- | TRRAP  | NM_003496:exon35:c.4951C>T:p.R1651C   |
| chr7 | 98608684  | G | A | 50.4  | SNV | --- | TRRAP  | NM_003496:exon69:c.10819G>A:p.D3607N  |
| chr7 | 126544156 | T | - | 99.3  | DEL | --- | GRM8   | NM_000845:exon4:c.887delA:p.K296fs    |
| chr7 | 128845518 | C | T | 49.2  | SNV | --- | SMO    | NM_005631:exon4:c.815C>T:p.A272V      |
| chr7 | 152055732 | C | G | 100.0 | SNV | --- | KMT2C  | NM_170606:exon2:c.190G>C:p.E64Q       |

|       |           |     |     |       |     |           |        |                                                |
|-------|-----------|-----|-----|-------|-----|-----------|--------|------------------------------------------------|
| chr8  | 145739598 | C   | T   | 31.1  | SNV | ---       | RECQL4 | NM_004260:exon11:c.1853G>A:p.R618Q             |
| chr10 | 76789461  | G   | A   | 53.7  | SNV | ---       | KAT6B  | NM_012330:exon18:c.4879G>A:p.A1627T            |
| chr10 | 104160958 | ACG | -   | 53.6  | DEL | ---       | NFKB2  | NM_002502:exon19:c.2093_2095del:p.698_699del   |
| chr10 | 104160962 | G   | T   | 53.4  | SNV | ---       | NFKB2  | NM_002502:exon19:c.2097G>T:p.E699D             |
| chr11 | 32456494  | G   | A   | 69.1  | SNV | ---       | WT1    | NM_024426:exon1:c.398C>T:p.P133L               |
| chr11 | 118377154 | G   | A   | 53.0  | SNV | ---       | KMT2A  | NM_005933:exon27:c.10538G>A:p.G3513E           |
| chr12 | 46123699  | A   | G   | 51.4  | SNV | ---       | ARID2  | NM_152641:exon1:c.80A>G;p.H27R                 |
| chr12 | 49434492  | G   | -   | 55.1  | DEL | ---       | KMT2D  | NM_003482:exon31:c.7061delC:p.P2354fs          |
| chr12 | 56481660  | C   | T   | 46.8  | SNV | ---       | ERBB3  | NM_001982:exon6:c.695C>T:p.A232V               |
| chr12 | 121432115 | G   | -   | 55.3  | DEL | ---       | HNF1A  | NM_000545:exon4:c.862delG;p.G288fs             |
| chr13 | 28959144  | C   | T   | 42.6  | SNV | ---       | FLT1   | NM_002019:exon14:c.1994G>A:p.R665Q             |
| chr13 | 110435129 | G   | A   | 64.2  | SNV | ---       | IRS2   | NM_003749:exon1:c.3272C>T:p.P1091L             |
| chr14 | 23776992  | T   | G   | 51.6  | SNV | ---       | BCL2L2 | NM_004050:exon3:c.16T>G;p.S6A                  |
| chr14 | 99642359  | C   | -   | 100.0 | DEL | ---       | BCL11B | NM_022898:exon3:c.601delG;p.E201fs             |
| chr15 | 88420264  | G   | A   | 47.5  | SNV | ---       | NTRK3  | NM_002530:exon19:c.2380C>T:p.Q794X             |
| chr15 | 91295095  | A   | G   | 55.5  | SNV | ---       | BLM    | NM_000057:exon4:c.878A>G;p.D293G               |
| chr16 | 3807902   | G   | A   | 50.1  | SNV | ---       | CREBBP | NM_004380:exon18:c.3517C>T:p.R1173X            |
| chr17 | 8110651   | G   | A   | 52.5  | SNV | ---       | AURKB  | NM_004217:exon5:c.241C>T:p.R81C                |
| chr17 | 45360843  | G   | A   | 51.3  | SNV | ---       | ITGB3  | NM_000212:exon3:c.289G>A;p.D97N                |
| chr19 | 42795811  | C   | T   | 44.3  | SNV | ---       | CIC    | NM_015125:exon11:c.2800C>T:p.R934W             |
| chr19 | 57744888  | G   | T   | 46.7  | SNV | ---       | AURKC  | NM_003160:exon5:c.394G>T:p.D132Y               |
| chr20 | 31017181  | G   | A   | 50.0  | SNV | ---       | ASXL1  | NM_015338:exon6:c.512G>A:p.R171Q               |
| chr20 | 31017747  | -   | CAG | 52.3  | INS | ---       | ASXL1  | NM_015338:exon7:c.608_609insCAG:p.S203delinsSS |
| chr20 | 31019407  | C   | T   | 49.9  | SNV | ---       | ASXL1  | NM_015338:exon9:c.904C>T;p.R302C               |
| chr20 | 57415336  | C   | T   | 65.0  | SNV | ---       | GNAS   | NM_016592:exon1:c.175C>T;p.Q59X                |
| chr20 | 57415354  | C   | T   | 65.1  | SNV | ---       | GNAS   | NM_016592:exon1:c.193C>T;p.L65F                |
| chr20 | 57429959  | C   | T   | 46.3  | SNV | ---       | GNAS   | NM_080425:exon1:c.1639C>T;p.R547C              |
| chr22 | 33198077  | C   | -   | 52.1  | DEL | ---       | TIMP3  | NM_000362:exon1:c.90delC:p.H30fs               |
| <hr/> |           |     |     |       |     |           |        |                                                |
| HG18T |           |     |     |       |     |           |        |                                                |
| <hr/> |           |     |     |       |     |           |        |                                                |
| chr3  | 3214610   | C   | A   | 45.8  | SNV | ---       | CRBN   | NA (splicing)                                  |
| chr3  | 128204594 | G   | A   | 50.9  | SNV | ---       | GATA2  | NM_032638:exon3:c.847C>T;p.R283C               |
| chr3  | 134851696 | C   | T   | 51.0  | SNV | ---       | EPHB1  | NM_004441:exon5:c.1102C>T;p.R368W              |
| chr8  | 114111160 | A   | G   | 28.5  | SNV | ---       | CSMD3  | NM_052900:exon5:c.742T>C;p.S248P               |
| chr11 | 94194148  | -   | A   | 61.6  | INS | ---       | MRE11  | NM_005590:exon12:c.1280dupT;p.L427fs           |
| chr17 | 7578418   | T   | C   | 100.0 | SNV | COSM44732 | TP53   | NM_000546:exon5:c.512A>G;p.E171G               |
| chr21 | 46313417  | C   | T   | 47.6  | SNV | ---       | ITGB2  | NM_000211:exon10:c.1126G>A;p.D376N             |

Abbreviations: SNV, single nucleotide variant; MNV, multiple nucleotide variant; INS, insertion; DEL, deletion.

<sup>a</sup>The list of 409 genes is available at <http://assets.thermofisher.com/TFS-Assets/CSD/Reference-Materials/ion-ampliseq-cancer-panel-gene-list.pdf>.

<sup>b</sup>The cancer-specific mutations were detected referring to the profiles of matched normal DNA.

<sup>c</sup>The gene deletion was detected with Integrative Genomics Viewer.

**Supplementary table 5:** Mutational status of 409 cancer-related genes in 25 gastric cancer stem cell (GC-SC) spheroid lines in the second patient cohort detected using RNA sequencing (RNA-seq).

| Chrom                                                | Position  | Ref | Variant | Frequency | Type | Allele Name | Gene Symbol <sup>a</sup> | AAChange.refGene                            |
|------------------------------------------------------|-----------|-----|---------|-----------|------|-------------|--------------------------|---------------------------------------------|
| HG19T                                                |           |     |         |           |      |             |                          |                                             |
| chr9                                                 | 134053745 | G   | A       | 36.4      | SNV  | ---         | NUP214                   | NM_005085:exon24:c.3367G>A;p.V1123I         |
| chr17                                                | 7577120   | C   | T       | 100.0     | SNV  | COSM10660   | TP53                     | NM_001126115:exon4:c.422G>A;p.R141H         |
| HG20T                                                |           |     |         |           |      |             |                          |                                             |
| chr6                                                 | 56566690  | C   | T       | 54.5      | SNV  | ---         | DST                      | NM_183380:exon4:c.317G>A;p.R106H            |
| chr17                                                | 7577094   | G   | A       | 100.0     | SNV  | COSM10704   | TP53                     | NM_000546:exon8:c.844C>T;p.R282W            |
| chr19                                                | 11170854  | A   | C       | 100.0     | SNV  | ---         | SMARCA4                  | NM_003072:exon34:c.4902A>C;p.E1634D         |
| HG21T                                                |           |     |         |           |      |             |                          |                                             |
| chr3                                                 | 30732970  | G   | A       | 65.2      | SNV  | COSM33076   | TGFBR2                   | NM_003242:exon7:c.1583G>A;p.R528H           |
| chr17                                                | 37880261  | G   | T       | 97.6      | SNV  | COSM1251412 | ERBB2                    | NM_004448:exon19:c.2305G>T;p.D769Y          |
| chr17                                                |           |     |         | 100.0     |      | ---         | TP53                     | Splicing <sup>b</sup>                       |
| chr19                                                | 11101959  | AGA | -       | 47.2      | DEL  | COSM30583   | SMARCA4                  | NM_003072:exon8:c.1379_1381del;p.460_461del |
| HG22T                                                |           |     |         |           |      |             |                          |                                             |
| No detectable mutations in 409 cancer-related genes. |           |     |         |           |      |             |                          |                                             |
| HG23T                                                |           |     |         |           |      |             |                          |                                             |
| chr1                                                 | 27106320  | -   | G       | 33.3      | INS  | COSM6916114 | ARID1A                   | NM_006015:exon20:c.5932dupG;p.L1977fs       |
| HG24T                                                |           |     |         |           |      |             |                          |                                             |
| No detectable mutations in 409 cancer-related genes. |           |     |         |           |      |             |                          |                                             |
| HG25T                                                |           |     |         |           |      |             |                          |                                             |
| chr13                                                | 48934188  | T   | C       | 60.0      | SNV  | ---         | RB1                      | NM_000321:exon7:c.643T>C;p.S215P            |
| chr16                                                | 3828111   | G   | A       | 30.4      | SNV  | COSM7347140 | CREBBP                   | NM_004380:exon10:c.2014C>T;p.R672C          |
| chr17                                                | 37682291  | C   | T       | 50.0      | SNV  | ---         | CDK12                    | NM_015083:exon13:c.3482C>T;p.T1161M         |
| HG26T                                                |           |     |         |           |      |             |                          |                                             |
| chr8                                                 | 57079350  | T   | C       | 55.0      | SNV  | ---         | PLAG1                    | NM_002655:exon5:c.955A>G;p.I319V            |
| chr20                                                | 39795470  | G   | A       | 47.0      | SNV  | COSM3291377 | PLCG1                    | NM_002660:exon19:c.2272G>A;p.E758K          |
| HG28T                                                |           |     |         |           |      |             |                          |                                             |
| chr17                                                | 7577100   | T   | C       | 100.0     | SNV  | COSM11123   | TP53                     | NM_000546:exon8:c.838A>G;p.R280G            |
| HG29T                                                |           |     |         |           |      |             |                          |                                             |
| chr1                                                 | 27106804  | C   | -       | 42.1      | DEL  | ---         | ARID1A                   | NM_006015:exon20:c.6415delC;p.P2139fs       |
| chr2                                                 | 148683686 | A   | -       | 54.2      | DEL  | ---         | ACVR2A                   | NM_001616:exon10:c.1303delA;p.K435fs        |
| chr3                                                 | 30691872  | AA  | -       | 100.0     | DEL  | COSM5989666 | TGFBR2                   | NM_001024847:exon4:c.449_450del;p.E150fs    |
| chr3                                                 | 30691873  | -   | A       | 100.0     | INS  | ---         | TGFBR2                   | NM_001024847:exon4:c.450dupA;p.E150fs       |
| chr3                                                 | 66023896  | C   |         | 37.5      | DEL  | ---         | MAGI1                    | NM_004742:exon1:c.88delG;p.V30X             |

|       |           |     |   |      |     |             |        |                                           |
|-------|-----------|-----|---|------|-----|-------------|--------|-------------------------------------------|
| chr3  | 69928320  | C   | T | 62.5 | SNV | ---         | MITF   | NM_006722:exon2:c.137C>T:p.P46L           |
| chr3  | 187447663 | C   | T | 55.8 | SNV | ---         | BCL6   | NM_001706:exon5:c.530G>A:p.S177N          |
| chr3  | 195595423 | C   | A | 41.1 | SNV | ---         | TNK2   | NM_005781:exon12:c.1701G>T:p.E567D        |
| chr3  | 195615342 | A   | G | 36.7 | SNV | ---         | TNK2   | NM_005781:exon2:c.118T>C:p.Y40H           |
| chr5  | 138223183 | G   | A | 36.2 | SNV | COSM6369106 | CTNNA1 | NM_001903:exon9:c.1148G>A:p.R383H         |
| chr5  | 176722087 | C   | - | 35.7 | DEL | ---         | NSD1   | NM_022455:exon23:c.7718delC:p.S2573fs     |
| chr6  | 52876605  | G   | A | 40.9 | SNV | ---         | ICK    | NM_014920:exon11:c.1454C>T:p.A485V        |
| chr6  | 56434717  | T   | - | 41.9 | DEL | ---         | DST    | NM_015548:exon35:c.5946delA:p.K1982fs     |
| chr6  | 56600064  | T   | C | 33.3 | SNV | ---         | DST    | NM_183380:exon2:c.115A>G:p.K39E           |
| chr7  | 116395528 | T   | A | 48.7 | SNV | ---         | MET    | NM_000245:exon6:c.1821T>A:p.N607K         |
| chr9  | 120475384 | TTC | - | 42.1 | DEL | ---         | TLR4   | NM_003266:exon4:c.858_860del:p.286_287del |
| chr9  | 133759541 | C   | T | 47.5 | SNV | ---         | ABL1   | NM_005157:exon11:c.1864C>T:p.R622W        |
| chr9  | 133759623 | C   | - | 31.6 | DEL | ---         | ABL1   | NM_005157:exon11:c.1946delC:p.T649fs      |
| chr9  | 133760108 | C   | T | 25.9 | SNV | ---         | ABL1   | NM_005157:exon11:c.2431C>T:p.P811S        |
| chr10 | 76735496  | G   | C | 56.3 | SNV | ---         | KAT6B  | NM_012330:exon8:c.1401G>C:p.K467N         |
| chr10 | 76788342  | C   | T | 36.5 | SNV | COSM257480  | KAT6B  | NM_012330:exon18:c.3760C>T:p.R1254C       |
| chr11 | 69456196  | G   | A | 48.3 | SNV | ---         | CCND1  | NM_053056:exon1:c.115G>A:p.A39T           |
| chr11 | 95825682  | C   | T | 40.0 | SNV | ---         | MAML2  | NM_032427:exon2:c.1513G>A:p.G505S         |
| chr12 | 25398284  | C   | T | 53.3 | SNV | COSM521     | KRAS   | NM_004985:exon2:c.35G>A:p.G12D            |
| chr12 | 132510328 | C   | T | 34.8 | SNV | ---         | EP400  | NM_015409:exon25:c.4993C>T:p.P1665S       |
| chr15 | 74315557  | G   | A | 34.1 | SNV | COSM1937940 | PML    | NM_002675:exon3:c.991G>A:p.A331T          |
| chr16 | 14029219  | G   | A | 46.2 | SNV | COSM8194527 | ERCC4  | NM_005236:exon8:c.1430G>A:p.R477Q         |
| chr17 | 5436192   | G   | - | 28.6 | DEL | ---         | NLRP1  | NM_014922:exon11:c.3246delC:p.P1082fs     |
| chr17 | 12043184  | A   | G | 27.0 | SNV | ---         | MAP2K4 | NM_003010:exon10:c.1069A>G:p.K357E        |
| chr17 | 75484906  | G   | A | 38.0 | SNV | ---         | SEPT9  | NM_006640:exon6:c.1168G>A:p.V390I         |
| chr19 | 18870855  | C   | A | 40.5 | SNV | ---         | CRTC1  | NM_015321:exon8:c.703C>A:p.L235M          |
| chr19 | 45855781  | T   | C | 28.9 | SNV | COSM1630983 | ERCC2  | NM_000400:exon21:c.2029A>G:p.M677V        |
| chr20 | 54958077  | T   | C | 26.5 | SNV | ---         | AURKA  | NM_003600:exon5:c.530A>G:p.Q177R          |
| chr20 | 54961519  | G   | T | 38.3 | SNV | COSM6274846 | AURKA  | NM_003600:exon3:c.113C>A:p.P38H           |
| chrX  | 44732910  | C   | - | 41.2 | DEL | ---         | KDM6A  | NM_021140:exon1:c.113delC:p.S38fs         |

---

HG32T

|       |           |   |   |      |     |             |          |                                     |
|-------|-----------|---|---|------|-----|-------------|----------|-------------------------------------|
| Chr1  | 2493196   | C | G | 51.1 | SNV | ---         | TNFRSF14 | NM_003820:exon6:c.636C>G:p.I212M    |
| Chr2  | 148672848 | T | C | 58.1 | SNV | ---         | ACVR2A   | NM_001616:exon5:c.617T>C:p.V206A    |
| Chr3  | 142188286 | T | G | 32.4 | SNV | ---         | ATR      | NM_001184:exon38:c.6445A>C:p.I2149L |
| Chr20 | 36030983  | C | T | 32.6 | SNV | COSM4430704 | SRC      | NM_005417:exon12:c.1262C>T:p.A421V  |

---

HG33T

|       |           |   |   |       |     |            |        |                                     |
|-------|-----------|---|---|-------|-----|------------|--------|-------------------------------------|
| chr3  | 10084304  | T | C | 28.6  | SNV | ---        | FANCD2 | NM_033084:exon11:c.845T>C:p.I282T   |
| chr6  | 56434742  | G | A | 33.3  | SNV | ---        | DST    | NM_015548:exon35:c.5921C>T:p.S1974L |
| chr6  | 56434780  | C | A | 100.0 | SNV | ---        | DST    | NM_015548:exon35:c.5883G>T:p.Q1961H |
| chr6  | 56505257  | A | G | 28.6  | SNV | ---        | DST    | NM_015548:exon4:c.563T>C:p.L188S    |
| chr11 | 108117816 | G | A | 40.0  | SNV | ---        | ATM    | NM_000051:exon8:c.1027G>A:p.E343K   |
| chr15 | 99251312  | T | C | 50.0  | SNV | ---        | IGF1R  | NM_000875:exon2:c.616T>C:p.W206R    |
| chr17 | 7576873   | C | A | 100.0 | SNV | COSM307331 | TP53   | NM_000546:exon9:c.973G>T:p.G325X    |
| chr22 | 23652547  | G | A | 35.0  | SNV | ---        | BCR    | NM_004327:exon18:c.3109G>A:p.E1037K |

---

HG34T

|      |           |   |   |      |     |           |     |                                    |
|------|-----------|---|---|------|-----|-----------|-----|------------------------------------|
| chr5 | 112173917 | C | T | 50.0 | SNV | COSM18852 | APC | NM_000038:exon16:c.2626C>T:p.R876X |
|------|-----------|---|---|------|-----|-----------|-----|------------------------------------|

|       |           |   |   |      |     |             |       |                                     |
|-------|-----------|---|---|------|-----|-------------|-------|-------------------------------------|
| chr5  | 112175639 | C | T | 58.3 | SNV | COSM13127   | APC   | NM_000038:exon16:c.4348C>T;p.R1450X |
| chr11 | 71726490  | C | T | 47.8 | SNV | COSM9833905 | NUMA1 | NM_006185:exon15:c.2059G>A;p.A687T  |
| chr12 | 46230707  | C | T | 66.7 | SNV | COSM6955940 | ARID2 | NM_152641:exon8:c.956C>T;p.S319F    |

---

HG35T

|       |           |   |   |       |     |             |        |                                     |
|-------|-----------|---|---|-------|-----|-------------|--------|-------------------------------------|
| chr1  | 27106861  | C | T | 56.3  | SNV | COSM51432   | ARID1A | NM_006015:exon20:c.6472C>T;p.R2158X |
| chr5  | 112175799 | C | A | 100.0 | SNV | COSM5732639 | APC    | NM_000038:exon16:c.4508C>A;p.S1503X |
| chr10 | 49612963  | A | C | 50.0  | SNV | ---         | MAPK8  | NM_139046:exon5:c.191A>C;p.Q64P     |
| chr12 | 56489535  | G | A | 54.5  | SNV | COSM1677075 | ERBB3  | NM_001982:exon17:c.2000G>A;p.R667H  |
| chr17 |           |   |   | 100.0 |     | ---         | TP53   | Splicing <sup>b</sup>               |

---

HG36T

|       |          |   |   |      |     |             |      |                                    |
|-------|----------|---|---|------|-----|-------------|------|------------------------------------|
| chr16 | 50830391 | A | G | 48.9 | SNV | ---         | CYLD | NM_015247:exon20:c.2843A>G;p.Q948R |
| chr17 | 29509642 | G | T | 30.4 | SNV | COSM3179569 | NF1  | NM_000267:exon8:c.847G>T;p.D283Y   |

---

HG37T

|       |           |   |   |       |     |           |      |                                     |
|-------|-----------|---|---|-------|-----|-----------|------|-------------------------------------|
| chr2  | 47690192  | T | C | 52.4  | SNV | ---       | MSH2 | NM_000251:exon9:c.1409T>C;p.V470A   |
| chr7  | 116422120 | G | T | 37.1  | SNV | ---       | MET  | NM_000245:exon18:c.3601G>T;p.V1201F |
| chr17 | 7577547   | C | A | 100.0 | SNV | COSM11196 | TP53 | NM_000546:exon7:c.734G>T;p.G245V    |

---

HG38T

|       |           |   |   |       |     |             |        |                                  |
|-------|-----------|---|---|-------|-----|-------------|--------|----------------------------------|
| chr10 | 102891485 | G | A | 100.0 | SNV | ---         | TLX1   | NM_005521:exon1:c.187G>A;p.A63T  |
| chr14 | 92482072  | C | T | 47.6  | SNV | COSM6279187 | TRIP11 | NM_004239:exon6:c.791G>A;p.R264Q |
| chr17 | 7577574   | T | C | 100.0 | SNV | COSM10731   | TP53   | NM_000546:exon7:c.707A>G;p.Y236C |

---

HG39T

|       |          |   |   |      |     |     |        |                                     |
|-------|----------|---|---|------|-----|-----|--------|-------------------------------------|
| chr15 | 90633765 | A | G | 48.0 | SNV | --- | IDH2   | NM_002168:exon3:c.319T>C;p.Y107H    |
| chr17 | 48264477 | G | A | 51.9 | SNV | --- | COL1A1 | NM_000088:exon47:c.3430C>T;p.P1144S |

---

HG40T

|       |           |   |   |      |     |             |       |                                     |
|-------|-----------|---|---|------|-----|-------------|-------|-------------------------------------|
| chr1  | 226564855 | G | A | 60.0 | SNV | COSM1219296 | PARP1 | NM_001618:exon13:c.1895C>T;p.T632M  |
| chr6  | 160468835 | C | A | 39.6 | SNV | ---         | IGF2R | NM_000876:exon17:c.2241C>A;p.N747K  |
| chr22 | 41554449  | G | A | 40.0 | SNV | ---         | EP300 | NM_001429:exon19:c.3535G>A;p.G1179S |

---

HG42T

|       |           |   |   |       |     |             |        |                                     |
|-------|-----------|---|---|-------|-----|-------------|--------|-------------------------------------|
| chr1  | 27087503  | C | T | 100.0 | SNV | COSM184236  | ARID1A | NM_006015:exon5:c.2077C>T;p.R693X   |
| chr3  | 178936091 | G | A | 42.9  | SNV | COSM763     | PIK3CA | NM_006218:exon10:c.1633G>A;p.E545K  |
| chr5  | 112176008 | G | T | 43.8  | SNV | COSM4167225 | APC    | NM_000038:exon16:c.4717G>T;p.E1573X |
| chr22 | 23655131  | C | T | 32.8  | SNV | ---         | BCR    | NM_004327:exon20:c.3380C>T;p.T1127M |
| chr22 | 41546045  | C | T | 56.5  | SNV | ---         | EP300  | NM_001429:exon14:c.2660C>T;p.T887I  |

---

HG43T

|      |         |   |   |      |     |     |        |                                    |
|------|---------|---|---|------|-----|-----|--------|------------------------------------|
| chr7 | 2956956 | G | C | 41.3 | SNV | --- | CARD11 | NM_032415:exon20:c.2671C>G;p.R891G |
|------|---------|---|---|------|-----|-----|--------|------------------------------------|

---

HG44T

|      |           |   |   |       |     |             |        |                                       |
|------|-----------|---|---|-------|-----|-------------|--------|---------------------------------------|
| chr6 | 51890782  | T | C | 50.0  | SNV | ---         | PKHD1  | NM_170724:exon32:c.3826A>G;p.R1276G   |
| chr6 | 152461248 | T | C | 33.3  | SNV | ---         | SYNE1  | NM_033071:exon140:c.25151A>G;p.E8384G |
| chr7 | 2959046   | C | G | 29.3  | SNV | COSM452935  | CARD11 | NM_032415:exon18:c.2470G>C;p.D824H    |
| chr9 | 22006138  | G | A | 100.0 | SNV | COSM6983462 | CDKN2B | NM_004936:exon2:c.265C>T;p.R89W       |

|       |           |   |   |       |     |             |        |                                     |
|-------|-----------|---|---|-------|-----|-------------|--------|-------------------------------------|
| chr15 | 91292605  | C | T | 25.0  | SNV | ---         | BLM    | NM_000057:exon3:c.107C>T;p.T36I     |
| HG45T |           |   |   |       |     |             |        |                                     |
| chr7  | 2977555   | G | A | 31.3  | SNV | COSM3027901 | CARD11 | NM_032415:exon8:c.1129C>T;p.R377W   |
| HG46T |           |   |   |       |     |             |        |                                     |
| chr11 | 64572285  | G | A | 68.8  | SNV | COSM8474098 | MEN1   | NM_000244:exon10:c.1369C>T;p.R457W  |
| chr17 | 7579311   | C | T | 100.0 | SNV | ---         | TP53   | Splicing <sup>b</sup>               |
| HG47T |           |   |   |       |     |             |        |                                     |
| chr1  | 179077046 | T | A | 50.0  | SNV | ---         | ABL2   | NM_007314:exon12:c.3356A>T;p.Y1119F |
| chr7  | 91630394  | G | C | 44.4  | SNV | ---         | AKAP9  | NM_005751:exon8:c.1163G>C;p.R388T   |
| chr8  | 118825130 | G | A | 54.8  | SNV | COSM1454473 | EXT1   | NM_000127:exon8:c.1703C>T;p.T568M   |
| chr8  | 42166476  | G | A | 38.5  | SNV | COSM1099990 | IKBKB  | NM_001556:exon8:c.625G>A;p.G209S    |
| chr17 | 7577106   | G | A | 100.0 | SNV | COSM10939   | TP53   | NM_000546:exon8:c.832C>T;p.P278S    |
| chr19 | 18856733  | A | G | 40.0  | SNV | ---         | CRTC1  | NM_015321:exon3:c.344A>G;p.H115R    |

Abbreviations: SNV, single nucleotide variant; INS, insertion; DEL, deletion.

<sup>a</sup>Only mutations in 409 cancer-related genes (see Table S4) were listed.

<sup>b</sup>Aberrant splicing was detected with Integrative Genomics Viewer.



**Supplementary table 6:** Summary of immunohistochemistry analysis for mismatch repair proteins in the primary tumor and spheroids in four hypermutated gastric cancer (GC) cases.

|       | MSH2              |           |         |           | MSH6              |           |         |           |
|-------|-------------------|-----------|---------|-----------|-------------------|-----------|---------|-----------|
|       | Normal epithelium |           | Cancer  |           | Normal epithelium |           | Cancer  |           |
|       | Primary           | Spheroids | Primary | Spheroids | Primary           | Spheroids | Primary | Spheroids |
| HG3T  | +                 | +         | +       | +         | +                 | +         | +       | +         |
| HG10T | +                 | +         | +       | +         | +                 | +         | +       | +         |
| HG13T | +                 | +         | +       | +         | +                 | +         | +       | +         |
| HG17T | +                 | +         | +       | +         | +                 | +         | +       | +         |

  

|       | MLH1              |           |         |           | PMS2              |           |         |           |
|-------|-------------------|-----------|---------|-----------|-------------------|-----------|---------|-----------|
|       | Normal epithelium |           | Cancer  |           | Normal epithelium |           | Cancer  |           |
|       | Primary           | Spheroids | Primary | Spheroids | Primary           | Spheroids | Primary | Spheroids |
| HG3T  | +                 | +         | -       | -         | +                 | +         | -       | -         |
| HG10T | +                 | +         | -       | -         | +                 | +         | -       | -         |
| HG13T | +                 | +         | -       | -         | +                 | +         | -       | -         |
| HG17T | +                 | +         | -       | -         | +                 | +         | -       | -         |

Abbreviations: +, positive; -, negative.
